# Supplementary material for: Main complaints identified by parents of children with developmental delays during the initial consultation: a 10-year all-case study
Source: PeerJ. 2025 Feb 28;13:e19044. doi: 10.7717/peerj.19044 (PMC11874933; doi:10.7717/peerj.19044)
Supplement: Data 1 [file peerj-13-19044-s001.xlsx]

## Sheet: data
Referral source (0 other than HP1)）	year	sex（male０、female１）	age in months	diagnosis （with1without0）	main complaint	Visual function	Emotional problems	Communication problems	Language development	Mental development	Motor development	General developmental issues	Consultation regarding rehabilitation services	Childcare and preschool counseling	Conduct problems	Hyperactivity/inattention	Feeding problems	Sensory bias
0	2017	0	31	0		0	0	0	0	0	0	0	0	0	1	1	0	0
0	2017	0	34	0		0	0	0	1	0	0	0	0	0	0	0	0	0
1	2017	0	65	0		0	0	0	1	1	0	0	0	0	0	0	0	0
0	2017	0	71	0		0	0	1	0	0	0	0	1	1	0	0	0	0
1	2017	0	25	0		0	0	0	0	0	1	0	0	0	0	0	0	0
0	2017	0	34	0		0	0	0	1	0	0	0	0	0	0	0	0	0
0	2017	0	64	0		0	0	0	1	0	0	0	0	0	0	1	0	0
0	2017	1	68	0		0	0	0	1	0	0	0	0	0	0	0	1	0
1	2017	0	42	0		0	1	0	0	0	0	0	0	0	0	0	0	0
1	2017	0	33	0		0	0	1	0	0	0	0	0	0	0	0	0	0
0	2017	0	39	0		0	0	0	1	0	0	0	0	0	1	1	0	0
0	2017	0	30	0		0	0	0	0	0	0	0	1	0	0	0	0	0
0	2017	1	30	0		0	0	0	0	0	0	0	1	0	0	0	0	0
0	2017	0	18	0		0	0	0	1	0	1	0	0	0	1	0	0	0
0	2017	0	67	0		0	0	0	1	0	1	0	0	0	0	0	0	0
0	2017	0	71	0		0	0	0	0	0	0	0	0	0	0	1	0	0
0	2017	1	32	0		0	0	0	0	0	0	0	1	0	0	0	0	0
1	2017	0	40	0		0	0	0	0	0	0	0	0	0	0	1	0	1
1	2017	0	71	0		0	0	0	1	0	0	0	0	0	1	0	0	0
0	2017	1	19	0		0	0	1	0	0	1	0	0	0	0	0	0	0
1	2017	0	18	0		0	0	0	0	0	0	0	0	1	0	0	0	0
0	2017	0	30	0		0	0	0	0	0	0	0	0	1	0	0	0	0
0	2017	0	72	0		0	0	0	1	0	0	0	0	0	0	0	0	0
0	2017	0	67	0		0	0	0	0	0	0	0	0	0	0	1	0	0
0	2017	0	31	0		0	0	0	0	0	0	0	0	0	0	1	0	0
1	2017	0	36	0		0	1	0	0	0	0	0	0	0	0	0	0	0
1	2017	0	64	0		0	0	0	0	0	0	1	0	0	0	0	0	0
0	2017	1	54	0		0	0	0	0	0	0	1	0	0	0	0	0	0
1	2017	1	11	0		0	0	0	0	0	0	0	0	0	0	1	0	0
0	2017	0	70	0		0	0	0	0	0	0	0	0	1	0	0	0	0
0	2017	1	31	0		0	0	0	0	0	0	0	0	1	0	0	0	0
0	2017	0	74	0		0	0	0	1	0	0	0	0	0	0	0	0	0
0	2017	0	18	0		0	0	0	1	0	0	0	0	0	0	0	0	0
1	2017	1	9	0		0	0	1	0	0	0	0	0	1	0	0	0	0
1	2017	0	34	0		0	0	0	1	0	0	0	0	0	0	0	0	0
0	2017	0	29	0		0	0	0	1	0	1	0	0	0	0	0	0	0
0	2017	0	28	0		0	0	0	1	0	0	0	0	0	0	0	0	0
1	2017	1	32	0		0	0	0	0	0	1	0	1	0	0	0	0	0
0	2017	0	60	0		0	0	0	0	0	0	0	0	1	0	0	0	0
0	2017	0	26	0		0	0	0	0	0	0	1	0	0	0	0	0	0
0	2017	0	70	0		0	0	0	1	0	0	0	0	0	0	0	0	0
0	2017	0	56	0		0	0	0	0	0	0	0	0	0	0	1	0	0
0	2017	0	31	0		0	0	0	0	0	0	1	0	0	0	0	0	0
0	2017	0	23	0		0	0	0	0	0	1	0	0	0	0	0	0	0
0	2017	1	58	0		0	0	0	1	0	0	0	0	0	0	0	0	0
0	2017	0	60	0		0	0	0	1	0	1	0	0	0	1	0	0	0
0	2017	0	28	0		0	1	0	1	0	0	0	0	0	0	0	0	0
1	2017	0	47	0		0	0	0	0	0	0	0	1	1	0	0	0	0
0	2017	0	63	0		0	1	0	0	0	0	0	0	0	1	0	0	1
0	2017	0	63	0		0	0	0	1	0	0	0	0	0	0	0	0	0
1	2017	0	31	0		0	0	0	1	0	0	0	0	0	0	0	0	0
0	2017	0	71	0		0	0	0	1	0	0	0	0	0	0	0	0	0
0	2017	0	42	0		0	0	1	0	0	0	0	0	1	0	0	0	0
0	2017	0	29	0		0	1	1	0	0	0	0	0	0	0	0	0	0
0	2017	0	32	0		0	0	0	0	0	0	0	1	0	0	0	0	0
0	2017	0	60	0		0	0	1	1	0	0	0	0	0	0	0	0	0
1	2017	1	19	0		0	1	0	0	0	0	0	0	0	1	0	1	0
0	2017	0	29	0		0	0	1	0	0	0	0	0	0	0	0	0	0
0	2017	1	24	0		0	0	0	0	0	0	1	0	0	0	0	0	0
0	2017	0	36	0		0	0	0	0	0	1	0	0	0	0	0	0	0
1	2017	0	37	0		0	0	0	0	0	0	0	0	1	0	0	0	0
0	2017	0	56	0		0	0	0	0	0	0	0	0	0	0	0	1	0
0	2017	0	36	0		0	0	1	0	0	0	0	0	0	0	0	0	0
1	2017	0	65	0		0	0	0	0	0	0	0	0	0	0	1	0	0
0	2017	1	31	0		0	0	0	0	0	0	0	0	0	0	1	0	0
0	2017	0	74	0		0	0	0	0	0	0	0	0	0	0	1	0	0
0	2017	1	30	0		0	0	0	1	0	0	0	0	0	1	1	0	0
0	2017	0	31	0		0	0	0	1	0	0	0	0	1	1	0	0	0
0	2017	0	32	0		0	0	1	1	0	0	0	0	0	0	0	0	0
0	2017	0	37	0		0	0	0	0	0	0	0	0	1	1	1	0	0
1	2017	0	80	0		0	0	0	0	1	0	0	0	0	0	0	0	0
1	2017	0	34	0		0	0	0	0	0	0	0	0	0	1	0	0	0
0	2017	1	44	0		0	1	0	0	0	0	0	0	0	0	0	0	0
0	2017	0	37	0		0	0	0	0	0	0	0	0	0	1	1	0	0
0	2017	0	70	0		0	0	0	1	0	0	0	0	1	0	0	0	0
0	2017	0	47	0		0	1	1	0	0	0	0	0	0	0	0	0	0
0	2017	0	67	0		0	1	0	0	0	1	0	0	0	0	0	0	1
1	2017	1	44	0		0	0	0	0	0	0	0	0	1	0	1	0	0
1	2017	0	61	0		0	0	1	1	0	0	0	0	0	0	0	0	0
1	2017	1	35	0		0	0	0	0	0	0	0	0	1	0	0	1	0
0	2017	0	29	0		0	1	0	1	0	0	0	0	0	0	0	0	0
1	2017	1	22	0		0	0	0	0	0	0	0	0	0	1	1	0	0
0	2017	0	31	0		0	1	0	1	0	0	0	0	0	0	1	0	0
1	2017	0	51	0		0	0	0	1	0	0	0	0	0	0	0	0	0
0	2017	1	69	0		0	1	0	0	0	0	0	0	0	0	0	0	0
0	2017	1	59	0		0	0	0	1	0	0	0	0	0	0	0	0	0
0	2017	1	66	0		0	0	1	0	0	0	0	0	0	1	0	0	0
0	2017	1	45	0		0	0	0	1	0	0	0	0	0	0	0	0	0
0	2017	0	29	0		0	0	0	0	0	1	0	0	0	0	1	0	1
0	2017	0	23	0		0	0	0	0	0	0	1	0	0	0	0	0	0
0	2017	0	30	0		0	0	0	0	0	0	1	0	1	0	0	0	0
0	2017	0	34	0		0	0	0	0	0	0	0	0	0	1	0	0	0
1	2017	0	60	0		0	0	0	1	0	0	0	0	0	1	0	0	0
1	2017	1	51	0		0	0	0	0	0	0	0	0	0	1	0	0	0
1	2017	0	25	0		0	0	1	1	0	0	0	0	0	0	0	0	0
0	2017	1	29	0		0	1	0	1	0	0	0	0	0	0	0	1	0
1	2017	0	25	0		0	0	0	1	0	0	0	0	0	0	1	0	0
1	2017	1	34	0		0	0	1	0	0	0	0	0	0	0	0	1	0
0	2017	1	13	0		0	0	0	0	0	0	0	1	0	1	0	0	0
0	2017	0	60	0		0	0	0	0	0	0	0	1	0	0	0	0	0
1	2017	1	29	0		0	0	0	0	0	0	0	1	0	0	0	0	0
0	2017	0	28	0		0	0	0	0	0	0	1	0	0	0	0	0	0
0	2017	0	32	0		0	0	1	0	0	0	0	0	0	1	0	0	0
0	2017	0	50	0		0	1	0	1	0	0	0	0	1	0	0	0	0
0	2017	0	30	0		0	0	0	1	0	0	0	0	0	0	0	0	0
1	2018	0	50	0		0	0	0	1	0	0	0	0	0	0	0	0	0
0	2018	0	29	0		0	0	0	1	0	1	0	0	0	0	0	0	0
1	2018	0	70	0		0	0	0	0	0	0	0	0	0	1	1	0	0
0	2018	0	31	0		0	0	0	0	0	0	0	1	0	0	0	0	0
0	2018	0	65	0		0	0	0	0	0	0	1	0	0	0	0	0	0
0	2018	0	61	0		0	0	0	0	0	0	0	0	0	1	0	0	0
0	2018	0	25	0		0	0	0	1	0	0	0	0	0	0	0	0	0
0	2018	0	29	0		0	0	0	1	0	0	0	0	0	0	0	0	0
0	2018	1	26	0		0	0	0	0	0	0	0	0	1	0	0	0	0
0	2018	0	27	0		0	0	0	0	0	0	0	1	0	0	0	0	0
0	2018	0	30	0		0	0	0	1	0	0	0	0	0	0	0	0	0
1	2018	1	28	0		0	0	0	0	0	1	0	0	0	0	0	0	0
1	2018	0	28	0		0	0	0	1	0	0	0	0	0	0	0	0	0
0	2018	0	29	0		0	0	0	1	0	0	0	0	0	0	0	0	0
1	2018	1	57	0		0	0	0	1	0	0	0	0	0	0	0	0	0
0	2018	0	20	0		0	0	0	0	0	0	1	0	0	0	0	0	0
0	2018	0	29	0		0	0	0	1	0	0	0	0	0	0	0	0	0
1	2018	0	7	0		0	0	0	1	0	0	0	0	0	1	0	0	0
0	2018	0	33	0		0	0	0	1	0	0	0	0	0	0	0	0	0
0	2018	1	30	0		0	0	0	0	0	0	0	0	1	0	0	0	0
1	2018	0	26	0		0	0	0	0	0	0	1	0	0	0	1	0	0
1	2018	1	63	0		0	0	0	1	0	0	0	0	1	0	0	0	0
0	2018	0	32	0		0	0	0	1	0	0	1	0	0	0	0	0	0
1	2018	0	53	0		0	0	0	1	0	0	0	0	0	0	0	0	0
0	2018	0	63	0		0	1	0	1	0	0	0	0	0	0	0	0	0
0	2018	0	36	0		0	0	0	0	0	0	1	0	0	0	0	0	0
1	2018	0	62	0		0	0	0	1	0	0	0	0	0	0	0	1	0
1	2018	0	66	0		0	0	0	1	0	0	0	0	0	0	0	0	0
1	2018	0	38	0		0	0	1	0	0	0	0	0	1	0	0	0	0
0	2018	0	30	0		0	0	0	1	0	1	0	0	0	0	0	1	0
0	2018	1	62	0		0	0	0	0	0	0	0	1	1	0	0	0	0
0	2018	0	39	0		0	0	0	1	0	0	0	0	0	0	0	0	0
0	2018	1	47	0		0	0	0	0	0	0	0	1	0	0	0	0	0
0	2018	1	61	0		0	0	0	1	0	1	0	0	0	0	0	0	0
1	2018	0	61	0		0	1	0	1	0	1	0	0	0	1	0	1	0
0	2018	0	29	0		0	1	1	0	0	1	0	0	0	0	0	0	0
0	2018	1	39	0		0	0	1	0	0	0	0	0	0	0	0	0	0
0	2018	1	9	0		0	0	0	1	0	0	0	0	0	0	0	0	0
0	2018	0	28	0		0	0	0	1	0	0	0	1	0	0	0	0	0
1	2018	0	55	0		0	0	1	0	0	0	0	0	0	1	0	0	0
1	2018	1	64	0		0	0	1	0	0	0	0	0	0	1	0	0	0
0	2018	1	28	0		0	0	0	0	0	0	1	0	0	0	0	0	0
0	2018	0	29	0		0	0	1	1	0	0	0	0	0	0	0	0	0
0	2018	0	38	0		0	1	1	1	0	0	0	0	0	0	1	0	0
1	2018	0	32	0		0	0	0	0	0	0	0	0	1	1	0	0	0
0	2018	0	19	0		1	0	0	0	0	0	0	0	0	0	1	0	0
0	2018	1	73	0		0	0	0	1	0	0	0	0	0	0	1	0	0
1	2018	0	31	0		0	0	0	1	0	1	0	0	0	1	0	0	0
0	2018	0	28	0		0	0	0	0	0	0	0	0	0	1	0	0	0
0	2018	0	63	0		0	0	0	0	0	0	0	0	0	1	1	0	0
0	2018	1	11	0		0	0	0	1	0	0	0	0	0	0	0	0	0
0	2018	1	57	0		0	1	0	0	0	0	0	0	0	0	0	0	0
1	2018	0	18	0		0	0	0	0	0	0	1	0	0	0	0	0	0
0	2018	0	64	0		0	1	0	1	0	0	0	0	1	0	0	0	0
0	2018	1	20	0		0	1	0	1	0	0	0	0	0	0	0	0	0
0	2018	0	71	0		0	0	0	0	0	0	0	1	1	0	0	0	0
0	2018	1	42	0		0	0	0	1	0	1	0	1	0	0	0	0	0
0	2018	1	73	0		0	0	0	1	0	1	0	0	0	0	0	0	0
1	2018	0	31	0		0	0	0	0	0	0	0	0	0	0	1	0	0
1	2018	0	22	0		0	1	0	0	0	0	0	0	0	0	0	0	0
1	2018	1	67	0		0	0	0	1	0	0	0	0	0	0	0	0	0
0	2018	0	25	0		0	0	1	1	0	0	0	0	0	1	0	0	0
0	2018	0	38	0		0	0	0	0	0	0	0	0	0	1	1	1	0
0	2018	0	38	0		0	0	0	1	0	0	0	0	1	1	0	0	0
1	2018	0	28	0		0	0	1	0	0	1	0	0	0	0	0	0	0
0	2018	1	28	0		0	1	1	0	0	0	0	0	0	0	0	0	0
0	2018	1	30	0		0	0	1	1	0	0	0	0	0	1	0	1	1
0	2018	1	64	0		0	0	0	1	0	0	0	0	0	0	0	0	0
0	2018	0	58	0		0	0	0	1	0	0	0	0	1	0	0	0	0
0	2018	0	37	0		0	0	0	0	0	1	0	1	0	0	0	0	0
0	2018	0	56	0		0	0	0	1	0	0	0	0	0	0	0	0	0
0	2018	0	30	0		0	0	0	1	1	0	0	0	0	0	1	0	0
1	2018	0	40	0		0	0	0	1	0	0	0	1	0	0	0	0	0
0	2018	1	31	0		0	0	0	0	0	0	0	1	0	0	0	0	0
0	2018	0	38	0		0	0	0	0	0	0	0	0	1	0	0	0	0
0	2018	1	23	0		0	0	0	1	0	0	0	0	0	0	0	0	0
0	2018	0	25	0		0	0	0	0	1	0	0	0	0	1	1	0	0
0	2018	0	25	0		0	0	0	1	0	0	0	0	1	0	0	0	0
1	2018	0	39	0		0	0	0	1	0	0	0	0	0	0	0	0	0
0	2018	1	41	0		0	0	0	0	0	0	0	0	0	1	0	0	0
0	2018	1	28	0		0	1	0	1	0	0	0	1	0	0	0	0	0
1	2018	1	67	0		0	1	1	0	0	0	0	0	0	1	0	0	0
1	2018	0	25	0		0	0	0	0	0	1	0	0	0	0	0	0	0
1	2018	0	36	0		0	0	0	1	0	0	1	0	0	0	0	0	0
0	2018	1	6	0		0	0	1	0	0	0	0	0	0	1	0	0	0
0	2018	0	69	0		0	0	0	0	0	0	0	0	1	0	1	0	0
0	2018	0	38	0		0	0	0	0	1	0	0	0	0	0	0	0	0
0	2018	1	75	0		0	0	0	0	0	0	1	0	0	0	0	0	0
1	2018	0	39	0		0	0	0	1	0	0	0	0	0	0	0	0	0
0	2018	1	27	0		0	0	0	1	0	0	0	0	0	0	0	0	0
0	2018	1	35	0		0	0	0	1	0	0	0	0	0	0	0	0	0
0	2018	0	60	0		0	0	0	1	0	0	0	0	0	1	0	0	0
1	2018	0	26	0		0	0	0	0	0	0	0	0	0	0	1	0	0
1	2018	0	23	0		0	0	0	1	0	0	0	0	0	0	0	0	0
0	2018	0	38	0		0	0	0	0	0	1	0	0	0	0	1	0	0
0	2018	0	24	0		0	0	0	1	0	0	0	0	0	0	0	0	0
0	2018	0	63	0		0	0	0	1	0	0	0	0	0	0	0	0	0
0	2018	1	23	0		0	0	0	1	0	0	0	0	0	0	1	0	0
0	2018	0	51	0		0	1	0	0	0	0	0	0	1	1	0	0	0
0	2018	1	30	0		0	0	1	1	0	0	0	0	0	0	0	1	1
0	2018	0	64	0		0	1	0	0	0	0	0	0	0	0	1	0	0
0	2018	0	31	0		0	0	0	0	0	0	1	0	0	0	0	1	0
0	2018	0	71	0		0	0	0	0	0	0	1	0	0	1	0	0	0
0	2018	0	42	0		0	0	0	0	0	0	1	0	0	0	0	0	0
0	2018	0	74	0		0	0	1	1	0	0	0	0	0	0	0	0	0
0	2018	0	34	0		0	1	1	0	0	0	0	0	1	0	0	0	0
0	2018	1	25	0		0	0	0	0	0	0	0	0	0	1	0	0	0
0	2018	0	40	0		0	0	0	0	0	0	0	0	0	0	1	0	0
1	2018	0	28	0		0	0	0	1	0	0	0	0	0	0	0	0	0
0	2018	0	75	0		0	0	0	1	0	0	1	0	0	0	0	0	0
0	2018	1	41	0		0	0	0	0	0	0	1	0	0	1	1	0	0
1	2018	0	68	0		0	0	0	0	0	0	0	1	1	0	0	0	0
1	2018	1	39	0		0	0	0	0	1	0	0	0	0	0	0	0	0
1	2018	1	50	0		0	0	0	0	0	0	0	0	1	0	0	0	0
0	2018	0	51	0		0	0	0	1	0	0	0	0	0	0	0	0	0
0	2018	0	31	0		0	0	0	1	0	0	0	0	0	0	0	0	0
0	2018	0	62	0		0	0	0	1	0	0	1	0	0	0	0	0	0
0	2018	0	27	0		0	0	0	0	0	0	1	0	1	0	0	0	0
0	2018	0	32	0		0	1	0	1	0	0	0	0	1	0	0	0	0
1	2018	0	34	0		0	0	1	0	0	0	0	0	0	1	0	0	0
0	2018	1	47	0		0	0	0	1	0	1	0	0	0	0	0	0	0
1	2018	1	34	0		0	0	0	1	0	0	0	0	1	0	0	0	0
1	2018	0	49	0		0	1	0	0	0	0	0	0	0	0	0	0	0
0	2018	0	31	0		0	0	0	0	0	0	0	0	1	0	0	0	0
0	2018	0	70	0		0	0	1	0	0	1	0	0	0	1	0	0	0
0	2018	0	81	0		0	0	0	1	0	0	0	0	0	0	0	0	0
0	2018	0	22	0		0	0	0	1	0	0	0	0	0	0	0	0	0
0	2018	0	78	0		0	0	0	1	0	0	0	0	0	1	0	0	0
0	2018	0	35	0		0	0	0	1	0	0	0	0	0	0	0	0	0
1	2018	0	22	0		0	0	0	0	0	0	0	1	0	0	0	0	0
0	2018	1	67	0		0	0	0	0	1	0	0	0	1	0	0	0	0
0	2018	0	32	0		0	0	0	1	0	0	0	0	0	0	0	0	0
0	2018	0	67	0		0	1	0	0	0	0	1	0	0	1	0	0	0
0	2019	0	38	0		0	0	1	0	0	0	1	0	0	0	0	0	0
1	2019	0	45	0		0	0	0	0	0	0	1	0	0	0	0	0	0
0	2019	0	65	0		0	0	0	0	0	0	0	0	0	1	0	0	0
1	2019	0	48	0		0	1	0	0	0	0	0	0	0	0	1	0	0
0	2019	0	43	0		0	0	0	1	0	0	0	0	0	0	0	0	0
0	2019	0	38	0		0	0	0	1	0	0	0	0	0	0	1	0	0
0	2019	0	71	0		0	0	1	1	0	0	0	0	0	0	0	0	0
0	2019	1	37	0		0	0	0	1	0	0	0	0	0	0	0	0	0
0	2019	0	51	0		0	0	1	0	0	0	0	0	0	0	0	0	0
0	2019	0	28	0		0	0	0	1	0	0	0	0	0	0	0	0	0
0	2019	0	30	0		0	0	1	0	0	0	0	0	0	0	0	0	0
0	2019	0	73	0		0	0	0	0	0	0	0	0	0	1	1	1	0
1	2019	0	31	0		0	0	0	0	0	0	0	1	0	0	0	0	0
0	2019	0	31	0		0	0	0	0	0	0	0	0	1	0	0	0	0
0	2019	0	40	0		0	0	0	1	0	0	0	0	0	0	0	0	0
0	2019	0	66	0		0	0	0	0	0	0	1	0	0	0	0	0	0
0	2019	1	64	0		0	0	1	0	1	1	0	0	0	0	0	0	0
1	2019	0	53	0		0	0	0	1	0	0	0	0	0	0	0	0	0
0	2019	1	37	0		0	0	0	1	0	1	0	0	0	0	0	0	0
0	2019	0	73	0		0	0	0	0	0	0	0	0	1	0	0	0	0
1	2019	1	72	0		0	1	1	0	0	0	0	1	0	0	0	0	0
0	2019	0	66	0		0	0	1	0	0	0	0	0	0	0	1	0	0
0	2019	0	61	0		0	0	0	0	0	0	0	1	0	0	0	0	0
0	2019	0	65	0		0	0	0	1	0	0	0	0	0	0	0	0	0
0	2019	0	66	0		0	1	0	0	0	0	0	0	1	1	0	0	0
0	2019	1	22	0		0	0	0	0	0	0	0	0	1	0	0	0	0
0	2019	0	20	0		0	0	0	0	0	0	1	0	0	0	0	0	0
0	2019	0	41	0		0	0	0	1	0	1	0	0	0	0	0	0	0
0	2019	0	30	0		0	0	0	0	0	1	0	1	0	0	0	0	0
1	2019	1	62	0		0	0	0	1	0	0	0	0	0	0	0	0	0
0	2019	0	32	0		0	0	0	1	1	0	0	0	0	0	0	0	0
1	2019	0	31	0		0	1	1	1	0	0	0	0	0	0	0	0	0
0	2019	0	57	0		0	0	0	1	0	0	0	0	1	0	0	0	0
0	2019	0	65	0		0	1	0	0	0	0	0	0	0	0	1	0	0
0	2019	1	57	0		0	0	0	1	0	0	0	0	1	0	1	0	0
1	2019	0	48	0		0	0	0	0	0	0	0	1	0	0	1	0	0
1	2019	1	30	0		0	0	0	0	0	0	1	1	0	0	0	0	0
0	2019	0	70	0		0	0	0	1	0	0	0	0	0	0	1	0	0
0	2019	0	23	0		0	0	0	1	0	0	0	0	0	0	0	0	0
0	2019	0	70	0		0	0	0	1	0	0	0	0	0	1	1	0	1
1	2019	0	24	0		0	0	0	1	0	0	0	0	0	0	0	0	0
1	2019	1	60	0		0	0	0	0	0	0	0	0	1	0	0	0	0
0	2019	0	34	0		0	0	0	0	0	0	0	0	1	0	0	0	0
0	2019	1	64	0		0	0	0	0	0	0	0	0	1	0	0	0	0
0	2019	0	68	0		0	1	1	0	0	0	1	0	0	1	1	1	0
0	2019	1	73	0		0	0	0	0	0	0	0	0	0	0	1	0	0
0	2019	0	40	0		0	0	0	0	1	0	0	0	0	1	1	0	0
1	2019	0	55	0		0	1	0	0	0	0	0	0	0	1	1	0	0
0	2019	0	64	0		0	0	0	0	1	0	0	0	0	0	0	0	0
1	2019	1	49	0		0	0	0	1	0	0	0	0	1	0	0	0	0
1	2019	1	19	0		0	0	0	1	0	0	0	0	0	0	0	0	0
1	2019	0	26	0		0	0	0	1	0	0	0	0	0	0	0	0	0
0	2019	0	55	0		0	0	0	0	0	0	0	1	1	0	0	0	0
0	2019	0	57	0		0	0	0	1	0	0	0	0	0	0	0	0	0
0	2019	0	61	0		0	0	0	0	0	0	0	0	0	1	0	0	0
0	2019	0	74	0		0	0	1	1	0	0	0	0	1	0	0	0	0
0	2019	0	29	0		0	1	0	1	0	0	0	1	0	0	0	0	0
0	2019	0	31	0		0	0	0	0	0	0	1	1	0	0	0	0	0
0	2019	0	59	0		0	0	0	1	0	0	0	0	0	0	1	0	0
1	2019	0	36	0		0	0	0	0	0	1	0	0	0	0	0	0	0
1	2019	0	36	0		0	0	0	0	0	0	1	0	0	0	0	0	0
1	2019	0	61	0		0	0	0	0	0	0	0	0	1	0	0	0	0
0	2019	0	24	0		0	0	0	1	0	0	0	0	0	0	0	0	0
1	2019	0	34	0		0	0	0	1	0	0	0	0	0	0	0	0	0
1	2019	1	38	0		0	0	0	1	0	0	0	0	0	0	0	0	0
0	2019	0	11	0		0	0	1	0	0	0	0	0	0	0	0	0	1
0	2019	0	34	0		0	0	1	0	0	0	0	0	0	0	0	0	0
0	2019	0	21	0		0	1	1	0	0	0	0	0	0	0	0	0	0
0	2019	0	28	0		0	0	0	1	0	0	1	0	0	0	0	0	0
0	2019	0	41	0		0	0	1	0	0	1	0	0	0	0	0	0	0
0	2019	0	31	0		0	1	0	1	0	0	0	0	0	0	1	0	0
0	2019	1	40	0		0	0	0	1	0	0	0	0	1	0	0	0	0
1	2019	1	25	0		0	1	0	0	0	0	0	0	0	0	0	0	0
0	2019	0	32	0		0	0	0	1	0	0	0	0	0	0	0	0	0
0	2019	0	45	0		0	0	0	1	0	0	0	0	1	0	0	0	1
0	2019	0	65	0		0	0	0	0	0	0	0	1	0	0	0	0	0
0	2019	0	44	0		0	0	0	1	0	0	0	0	0	0	1	0	0
0	2019	0	32	0		0	0	0	0	0	0	0	0	0	1	1	0	0
0	2019	0	26	0		0	0	0	0	0	0	1	1	0	0	0	0	0
1	2019	0	63	0		0	0	0	1	0	0	0	0	0	0	0	0	0
1	2019	0	60	0		0	1	0	0	0	0	0	0	0	0	0	0	0
0	2019	1	20	0		0	0	0	1	0	0	0	0	0	0	0	0	0
0	2019	0	46	0		0	0	0	1	0	0	0	0	0	0	0	0	0
1	2019	0	22	0		0	0	0	0	0	0	0	1	0	0	0	0	0
1	2019	1	39	0		0	0	1	0	0	0	0	0	0	0	1	0	0
1	2019	0	13	0		0	0	0	1	0	0	0	0	0	1	0	0	0
0	2019	0	32	0		0	0	0	0	0	0	1	0	0	0	1	0	0
1	2019	0	61	0		0	0	0	0	0	1	0	0	0	0	0	0	0
0	2019	0	25	0		0	0	0	1	0	0	0	0	0	0	0	0	0
0	2019	1	55	0		0	0	0	0	0	1	0	0	1	0	0	0	0
1	2019	0	39	0		0	0	0	0	0	0	0	0	0	1	0	0	0
0	2019	0	39	0		0	0	0	0	0	0	0	0	1	0	1	0	0
0	2019	0	25	0		0	0	1	1	0	0	0	0	0	0	0	0	0
0	2019	0	67	0		0	0	0	1	0	0	0	0	0	0	0	0	0
0	2019	0	12	0		0	0	0	1	0	0	0	0	0	0	0	0	0
0	2019	0	10	0		0	0	0	1	0	0	0	0	0	0	0	0	0
0	2019	1	19	0		0	0	0	1	0	0	0	0	0	0	0	0	0
0	2019	0	44	0		0	0	0	0	0	0	0	0	0	0	1	0	0
0	2019	0	65	0		0	1	0	1	0	0	0	0	0	0	0	0	0
0	2019	0	52	0		0	1	0	1	0	0	0	0	0	0	0	0	0
0	2019	0	36	0		0	0	0	1	0	0	0	0	0	0	1	0	0
0	2019	0	69	0		0	0	1	0	0	0	0	1	1	0	1	0	0
0	2019	0	25	0		0	0	1	0	0	0	1	0	0	0	0	0	0
0	2019	0	25	0		0	0	0	1	0	0	0	0	0	0	0	0	0
0	2019	0	23	0		0	1	0	0	0	0	0	0	1	0	0	0	0
0	2019	1	63	0		0	0	0	0	0	0	1	0	0	0	0	0	0
0	2019	0	30	0		0	0	0	0	0	0	0	0	0	1	0	0	0
0	2019	0	58	0		0	0	0	0	0	1	0	0	0	0	0	0	0
0	2019	1	38	0		0	0	0	1	0	0	0	0	0	0	0	0	0
0	2019	0	32	0		0	1	0	0	0	1	1	0	0	0	0	0	1
0	2019	0	69	0		0	0	1	1	0	0	0	0	0	0	0	0	0
0	2019	0	35	0		0	0	0	1	0	0	0	0	0	0	0	0	1
0	2019	0	28	0		0	0	1	0	0	1	0	0	0	0	0	0	0
0	2019	0	31	0		0	0	0	1	0	0	0	0	0	0	0	0	0
0	2019	1	66	0		0	0	0	0	0	0	1	0	0	0	1	0	0
0	2019	0	33	0		0	0	1	0	0	0	0	0	1	0	1	0	0
0	2019	0	65	0		0	0	0	0	0	0	1	0	0	0	0	0	0
0	2019	0	32	0		0	0	0	0	0	0	1	0	0	0	0	0	0
0	2019	0	61	0		0	1	0	1	0	0	0	0	0	0	1	0	0
0	2019	0	64	0		0	0	0	1	0	0	0	0	0	0	0	0	0
0	2019	0	55	0		0	0	0	1	0	0	0	1	0	1	1	0	0
0	2019	0	31	0		0	0	0	0	0	0	0	0	1	1	0	0	0
0	2019	0	69	0		0	1	0	0	0	0	0	0	1	0	1	0	0
0	2019	0	30	0		0	0	0	0	0	0	0	0	1	0	0	0	0
0	2019	1	16	0		0	1	0	0	0	0	0	0	0	1	1	0	0
0	2019	0	24	0		0	0	0	1	0	1	0	0	0	0	0	0	0
0	2019	1	23	0		0	0	0	0	0	0	1	0	0	0	0	0	0
1	2019	1	79	0		0	0	0	1	0	0	0	0	0	0	0	0	0
1	2019	1	63	0		0	0	1	1	0	0	1	0	0	0	0	0	0
1	2019	0	70	0		0	0	0	0	0	0	1	0	0	0	0	0	0
0	2019	0	31	0		0	0	0	1	0	1	0	1	0	0	0	0	0
0	2019	0	53	0		0	0	1	1	0	0	0	0	0	1	0	0	0
0	2019	1	47	0		0	0	1	1	0	1	0	0	0	0	0	0	0
0	2019	0	49	0		0	0	0	0	0	0	0	0	0	1	1	0	0
0	2019	0	59	0		0	0	0	0	0	0	0	1	0	0	0	0	0
0	2020	0	65	0		0	1	0	1	0	0	0	0	0	0	0	0	0
0	2020	0	21	0		0	0	0	0	0	0	1	0	0	0	0	0	0
0	2020	0	28	0		0	0	1	1	0	0	0	1	0	0	0	0	0
0	2020	0	28	0		0	0	0	0	0	1	0	0	0	0	0	0	0
0	2020	1	55	0		0	0	0	1	0	0	1	0	0	0	0	0	0
0	2020	1	66	0		0	0	0	1	0	1	0	0	0	0	0	0	0
1	2020	0	53	0		0	0	0	0	0	0	0	0	0	1	1	0	0
1	2020	0	30	0		0	1	1	0	0	0	0	0	0	0	0	0	0
0	2020	0	32	0		0	0	0	1	0	0	0	0	0	0	0	0	0
1	2020	0	62	0		0	0	1	0	0	0	0	0	0	0	0	0	0
0	2020	0	30	0		0	0	0	1	0	0	1	0	0	0	0	0	0
0	2020	0	30	0		0	0	0	1	0	1	0	0	0	0	0	0	0
0	2020	0	68	0		0	0	0	0	0	0	0	0	0	1	0	1	0
1	2020	0	19	0		0	1	0	0	0	1	0	1	0	0	0	0	0
1	2020	1	13	0		0	0	0	0	0	0	1	1	0	0	0	0	0
1	2020	1	74	0		0	0	1	1	0	0	0	0	0	0	0	0	0
0	2020	1	53	0		0	0	1	0	0	0	0	1	0	0	0	0	0
0	2020	0	37	0		0	0	1	0	0	0	0	0	1	1	0	0	0
0	2020	1	60	0		0	0	0	0	0	0	0	1	1	0	0	0	0
1	2020	0	23	0		0	0	1	1	0	0	0	1	0	0	0	0	0
0	2020	0	65	0		0	0	0	0	0	0	1	0	0	0	0	0	0
0	2020	0	21	0		0	0	0	1	0	0	0	0	0	0	0	0	0
0	2020	1	52	0		0	0	0	1	0	0	0	1	0	0	0	0	0
0	2020	0	30	0		0	0	0	0	0	0	1	0	0	0	0	0	0
0	2020	0	67	0		0	0	0	0	0	0	0	0	0	0	1	0	0
0	2020	0	70	0		0	0	0	0	0	0	1	0	0	0	0	0	0
1	2020	1	66	0		0	0	1	1	0	0	0	0	0	1	0	0	0
1	2020	0	44	0		0	0	0	1	0	0	0	0	0	0	0	0	0
0	2020	0	65	0		0	0	0	0	0	0	0	0	0	1	0	0	0
0	2020	0	52	0		0	0	0	0	0	0	0	1	0	0	0	0	0
0	2020	1	34	0		0	0	0	0	0	1	0	0	0	0	0	0	0
0	2020	0	37	0		0	0	0	1	0	0	0	0	0	0	0	0	0
0	2020	0	68	0		0	0	0	1	0	0	1	0	0	0	0	0	0
0	2020	0	36	0		0	0	0	0	0	0	0	0	0	0	1	0	0
0	2020	0	47	0		0	0	0	0	1	1	0	0	0	0	0	0	0
0	2020	0	22	0		0	0	0	0	0	0	1	0	0	1	0	1	0
0	2020	0	20	0		0	0	0	0	0	0	0	0	1	0	0	0	0
0	2020	0	23	0		0	0	0	1	0	0	0	0	0	0	0	0	0
0	2020	0	22	0		0	0	0	0	0	1	0	0	0	0	0	0	0
0	2020	1	36	0		0	0	0	0	0	0	1	1	0	0	0	0	0
0	2020	0	64	0		0	0	0	1	0	0	0	0	0	0	0	0	0
0	2020	1	30	0		0	1	0	1	0	0	0	0	0	0	0	0	0
0	2020	0	60	0		0	0	0	0	0	1	0	0	0	0	0	0	0
0	2020	0	54	0		0	0	0	1	0	0	0	0	0	0	0	0	0
0	2020	0	42	0		0	0	0	0	0	0	0	0	1	0	0	0	0
0	2020	1	40	0		0	0	0	0	0	0	1	0	0	0	0	0	0
1	2020	1	35	0		0	0	0	0	0	0	1	0	0	0	0	0	0
1	2020	0	60	0		0	0	0	0	0	0	1	0	0	0	0	0	0
0	2020	0	66	0		0	0	0	0	0	0	0	0	1	0	0	0	0
1	2020	0	68	0		0	0	0	0	0	0	0	0	1	0	0	0	0
1	2020	0	38	0		0	1	0	0	0	0	0	0	0	0	1	0	0
0	2020	0	56	0		0	0	0	0	0	0	0	1	0	0	0	0	0
1	2020	0	26	0		0	0	0	1	0	0	0	0	0	0	0	0	0
1	2020	0	50	0		0	1	0	0	0	0	0	0	0	0	0	0	0
1	2020	0	54	0		0	0	0	0	0	1	0	0	0	0	0	0	0
0	2020	0	26	0		0	0	0	0	0	0	0	0	0	0	0	1	0
0	2020	0	10	0		0	0	0	1	0	0	0	0	0	0	0	0	0
0	2020	0	47	0		0	1	0	0	0	0	0	0	0	0	0	0	0
0	2020	1	25	0		0	0	0	1	0	0	0	1	0	0	0	0	0
1	2020	0	16	0		0	1	0	0	0	0	0	0	0	0	0	0	0
0	2020	0	24	0		0	0	1	0	0	0	0	0	0	1	0	0	0
0	2020	0	34	0		0	0	0	0	0	0	1	0	0	0	0	0	0
0	2020	0	30	0		0	0	0	1	0	0	0	0	0	0	0	0	0
0	2020	0	32	0		0	0	0	1	0	0	0	0	0	0	0	0	0
0	2020	0	82	0		0	0	0	0	0	0	0	0	0	0	1	0	0
0	2020	0	30	0		0	0	0	0	0	0	0	0	0	0	1	0	0
1	2020	0	57	0		0	0	0	1	0	0	0	0	0	0	0	0	0
1	2020	0	62	0		0	0	0	0	0	0	0	0	0	0	1	0	0
1	2020	1	32	0		0	0	0	1	0	0	0	0	0	0	0	0	0
0	2020	0	21	0		0	0	0	0	0	0	1	0	0	0	0	0	0
0	2020	0	28	0		0	0	0	1	0	0	0	0	0	0	0	0	0
0	2020	0	35	0		0	0	1	0	0	0	0	0	0	0	0	0	0
1	2020	0	72	0		0	0	0	1	0	0	0	0	0	0	0	0	0
0	2020	0	33	0		0	0	0	1	0	0	0	0	0	0	0	0	0
0	2020	0	44	0		0	0	0	0	0	0	0	0	0	1	0	0	0
0	2020	0	68	0		0	0	0	1	0	0	0	0	0	1	0	0	0
1	2020	1	14	0		0	0	0	0	0	0	0	0	1	0	0	0	0
1	2020	1	22	0		0	0	0	1	0	0	0	0	0	0	0	0	0
1	2020	1	49	0		0	0	0	1	0	0	0	0	0	0	0	0	0
0	2020	1	22	0		0	0	0	1	0	0	0	0	0	0	0	0	0
0	2020	0	27	0		0	0	0	1	0	0	0	0	0	0	0	0	0
0	2020	0	28	0		0	0	0	0	0	0	0	0	0	1	0	0	0
0	2020	0	54	0		0	0	0	1	0	0	0	0	0	0	0	0	0
0	2020	0	24	0		0	0	1	0	0	0	0	1	0	0	0	0	0
0	2020	1	44	0		0	0	0	1	0	0	0	0	0	0	0	0	0
0	2020	1	24	0		0	0	0	0	0	0	0	1	0	0	0	0	0
0	2020	0	36	0		0	0	1	0	0	0	0	0	0	0	0	0	0
0	2020	0	43	0		0	0	0	0	0	0	0	1	0	0	0	0	0
0	2020	0	63	0		0	0	0	1	0	0	0	0	0	0	0	0	0
0	2020	0	40	0		0	0	0	1	0	0	0	0	0	0	0	0	0
1	2020	0	34	0		0	0	0	0	0	0	0	1	0	0	0	0	0
0	2020	0	37	0		0	0	0	0	0	0	0	0	0	0	0	1	0
0	2020	1	29	0		1	0	0	0	0	0	0	0	0	0	0	0	0
0	2020	0	27	0		0	0	0	0	0	0	1	0	0	0	0	0	0
1	2020	0	24	0		0	1	0	0	0	0	0	0	0	1	0	0	0
1	2020	0	29	0		0	0	0	1	0	0	0	0	0	0	0	0	0
0	2020	0	19	0		0	0	0	1	0	1	0	0	0	0	0	0	0
1	2020	0	31	0		0	0	0	1	0	0	0	0	0	0	0	0	0
0	2020	0	50	0		0	0	0	1	0	0	0	0	0	0	0	0	0
0	2020	1	23	0		0	0	0	1	0	0	0	0	0	0	0	0	0
0	2020	0	61	0		0	0	0	0	0	0	0	0	0	1	1	0	0
0	2020	0	52	0		0	1	0	1	0	0	0	0	1	0	0	0	0
0	2020	0	68	0		0	0	0	0	0	0	0	1	0	0	0	0	0
0	2020	0	12	0		0	0	0	1	0	0	0	0	0	1	0	0	0
0	2020	1	64	0		0	0	0	0	0	0	0	1	0	0	0	0	0
0	2021	1	43	0		0	0	0	1	0	0	0	0	0	1	1	0	0
0	2021	0	31	0		0	0	0	0	0	0	0	1	0	0	0	0	0
0	2021	1	41	0		0	0	0	0	0	0	0	0	1	0	0	0	0
1	2021	1	31	0		0	1	0	1	0	0	0	0	0	0	0	0	0
0	2021	0	15	0		0	0	1	0	0	0	0	0	0	0	1	0	0
0	2021	0	61	0		0	0	0	1	0	0	0	1	0	0	0	0	0
0	2021	1	8	0		0	0	0	1	0	0	0	0	0	0	0	0	0
0	2021	0	35	0		0	1	0	0	0	0	1	0	0	0	0	0	0
0	2021	0	40	0		0	0	1	1	0	0	0	0	0	0	0	0	0
0	2021	1	41	0		0	0	0	1	0	0	0	0	0	0	0	0	0
0	2021	0	24	0		0	0	0	1	0	0	0	0	0	0	0	0	0
0	2021	0	25	0		0	0	0	0	0	0	1	0	0	0	0	0	0
0	2021	0	31	0		0	0	0	0	0	0	0	1	0	0	0	0	0
0	2021	0	38	0		0	0	0	0	0	0	1	0	0	1	0	0	0
0	2021	1	31	0		0	0	0	0	0	0	0	0	1	1	1	0	0
0	2021	0	40	0		0	0	0	1	0	0	0	0	0	0	1	0	0
0	2021	0	22	0		0	0	0	0	0	0	0	0	0	1	0	0	0
0	2021	0	23	0		0	0	0	1	0	0	0	0	0	0	0	0	0
1	2021	0	37	0		0	0	0	0	0	0	1	0	0	0	0	0	0
0	2021	0	53	0		0	0	0	0	0	0	1	0	0	0	0	0	0
0	2021	1	20	0		0	0	0	0	0	0	0	0	0	0	1	0	0
1	2021	0	47	0		0	0	0	0	0	0	1	0	0	0	0	0	0
0	2021	1	20	0		0	0	0	1	0	0	0	0	0	0	0	0	0
1	2021	0	55	0		0	0	1	0	0	0	0	0	1	0	0	0	0
0	2021	0	13	0		0	0	0	1	0	0	0	0	0	0	0	0	0
0	2021	0	47	0		0	0	0	0	0	0	0	0	1	1	0	0	0
1	2021	0	64	0		0	0	0	0	0	0	1	0	0	0	0	0	0
1	2021	1	22	0		0	0	0	0	0	0	0	0	0	0	1	0	0
1	2021	0	22	0		0	0	0	0	0	0	1	0	0	0	0	0	0
1	2021	0	22	0		0	1	0	0	0	0	0	0	0	0	0	0	0
0	2021	0	63	0		0	0	0	0	0	1	0	0	0	0	0	0	0
0	2021	0	35	0		0	0	0	1	0	0	0	0	0	0	0	0	0
0	2021	0	29	0		0	0	0	0	0	0	1	1	0	0	0	0	0
0	2021	0	29	0		0	0	0	0	0	0	1	0	0	0	0	0	0
0	2021	1	58	0		0	0	0	0	0	0	1	1	0	0	0	0	0
0	2021	1	51	0		0	0	0	0	0	1	0	0	0	0	0	0	0
0	2021	0	32	0		0	0	0	0	0	1	0	0	0	0	0	0	0
0	2021	1	52	0		0	0	0	1	0	0	0	0	0	0	0	0	0
0	2021	0	53	0		0	0	0	0	0	0	0	1	1	0	0	0	0
0	2021	0	63	0		0	0	0	1	0	0	0	0	0	0	0	0	0
0	2021	0	31	0		0	0	0	1	0	0	0	0	0	0	0	0	0
1	2021	1	38	0		0	0	0	1	0	0	0	0	0	0	0	0	0
0	2021	0	26	0		0	0	0	1	0	0	0	0	0	0	0	0	0
0	2021	0	41	0		0	0	0	0	0	0	0	1	0	0	0	0	0
1	2021	1	73	0		0	0	0	1	0	0	0	0	0	0	0	0	0
1	2021	0	40	0		0	0	0	0	0	0	0	1	0	0	0	0	0
0	2021	0	71	0		0	0	0	0	0	0	0	0	0	0	1	0	0
1	2021	1	43	0		0	0	0	1	0	0	0	0	0	0	0	0	0
1	2021	1	17	0		0	0	0	1	0	1	0	0	0	0	0	0	0
1	2021	0	44	0		0	0	0	0	0	0	0	1	0	0	0	0	0
1	2021	0	61	0		0	1	0	0	0	0	0	0	0	0	0	0	0
1	2021	0	34	0		0	0	0	1	0	0	0	0	0	0	0	0	0
1	2021	0	24	0		0	0	0	0	0	0	1	1	0	0	0	0	0
0	2021	0	21	0		0	0	0	0	0	1	0	0	0	0	0	0	0
0	2021	0	28	0		0	0	0	0	0	0	0	0	1	0	0	0	0
0	2021	0	17	0		0	0	0	0	0	0	0	1	0	0	0	0	0
0	2021	0	63	0		0	0	0	0	0	0	1	0	0	0	0	0	0
0	2021	0	55	0		0	0	0	1	0	0	0	0	0	0	0	0	0
1	2021	0	33	0		0	0	0	0	0	0	1	0	0	0	0	0	0
1	2021	0	31	0		0	0	0	0	0	0	0	1	0	0	0	0	0
1	2021	0	33	0		0	0	0	0	0	0	0	1	0	0	0	0	0
0	2021	1	68	0		0	0	0	1	0	0	0	0	0	0	0	0	0
1	2021	0	43	0		0	0	0	1	0	0	1	0	0	0	0	0	0
0	2021	0	8	0		0	0	1	1	0	0	0	0	0	0	0	0	0
0	2021	0	27	0		0	0	0	1	0	0	0	0	0	0	0	0	0
0	2021	0	61	0		0	0	0	1	0	0	1	0	0	0	0	0	0
0	2021	1	62	0		0	0	0	0	0	0	0	0	0	0	1	0	0
1	2021	0	56	0		0	0	0	0	0	0	0	0	0	0	1	0	0
0	2021	0	48	0		0	0	0	1	0	0	0	0	0	0	0	0	0
0	2021	1	39	0		0	0	0	1	0	0	0	0	0	1	0	0	0
0	2021	0	31	0		0	0	0	0	0	0	0	0	0	1	0	0	0
1	2021	1	65	0		0	0	0	1	0	1	0	0	0	0	0	0	0
0	2021	0	53	0		0	0	0	1	0	0	0	0	0	0	0	0	0
0	2021	0	35	0		0	1	0	0	0	1	0	0	0	0	0	0	0
0	2021	1	60	0		0	0	0	1	0	0	0	0	0	0	0	0	0
0	2021	1	54	0		0	0	0	0	0	0	0	0	1	0	0	0	0
0	2021	0	20	0		0	0	0	0	0	0	0	1	0	0	0	0	0
1	2021	0	74	0		0	0	0	1	0	0	0	0	0	0	0	0	0
0	2021	1	29	0		0	0	0	0	0	0	0	0	0	0	1	0	0
0	2021	0	72	0		0	0	0	1	0	0	0	0	0	0	0	0	0
0	2021	0	27	0		0	0	0	0	0	0	0	0	1	0	0	0	0
0	2021	0	37	0		0	0	0	1	0	0	0	0	0	0	0	0	0
0	2021	1	29	0		0	0	0	1	0	1	0	0	0	0	0	0	0
0	2021	1	22	0		0	1	0	0	0	0	0	0	0	0	0	0	0
0	2021	0	68	0		0	0	0	0	0	0	0	0	0	1	0	0	0
0	2021	1	43	0		0	0	0	1	0	0	0	0	0	0	0	0	0
0	2021	1	36	0		0	0	0	0	0	0	1	0	0	0	0	1	0
0	2021	1	69	0		0	0	0	1	0	0	0	0	0	0	0	0	0
0	2021	1	23	0		0	0	0	0	0	0	0	0	0	0	1	0	0
1	2021	0	54	0		0	0	0	0	0	0	1	0	0	0	0	0	0
0	2021	1	28	0		0	0	0	1	0	0	0	0	0	0	0	0	0
0	2021	0	42	0		0	0	0	0	0	0	0	0	0	0	1	0	0
1	2021	1	64	0		0	0	0	0	0	0	0	0	1	0	0	0	0
1	2021	0	42	0		0	0	1	0	0	0	0	0	0	0	0	0	0
0	2021	0	22	0		0	0	0	1	0	0	0	0	0	0	0	0	0
0	2021	0	39	0		0	0	0	1	0	0	0	0	0	0	0	0	0
0	2021	0	67	0		0	0	0	0	0	0	0	1	0	0	0	0	0
0	2021	0	46	0		0	0	0	0	0	0	0	1	0	0	0	0	0
0	2021	0	26	0		0	0	0	0	0	0	0	0	0	1	0	0	0
0	2021	0	26	0		0	0	0	0	0	0	1	0	0	0	0	0	0
0	2021	1	37	0		0	0	0	0	0	1	0	0	0	0	0	0	0
1	2021	0	49	0		0	0	0	1	0	0	0	0	0	0	0	0	0
0	2021	1	30	0		0	0	0	1	0	0	0	0	0	0	0	0	0
0	2021	0	48	0		0	1	0	0	0	0	0	0	0	0	0	0	0
0	2021	0	47	0		0	0	0	1	0	0	0	0	0	0	0	0	0
0	2021	0	58	0		0	1	0	0	0	0	0	0	0	0	0	0	0
1	2021	0	87	0		0	0	0	0	0	0	1	1	0	0	0	0	0
0	2021	0	18	0		0	0	0	0	0	1	0	0	0	0	0	0	0
0	2021	0	50	0		0	0	0	0	0	0	0	1	0	0	0	0	0
0	2021	1	35	0		0	0	0	1	0	0	0	0	0	0	0	0	0
0	2021	0	56	0		0	0	0	0	0	0	0	0	0	0	0	0	1
1	2021	0	18	0		0	0	0	1	0	0	0	0	0	0	0	0	0
0	2021	0	19	0		0	0	1	1	0	0	0	0	0	0	0	0	0
0	2021	1	40	0		0	0	0	0	0	0	0	1	0	1	0	0	0
1	2021	0	12	0		0	0	0	1	0	0	0	0	0	0	0	0	0
1	2021	0	61	0		0	0	0	0	0	0	0	1	0	0	0	0	0
1	2021	1	14	0		0	0	0	1	0	0	0	0	0	0	1	0	0
0	2021	0	54	0		0	0	0	1	0	0	0	0	0	0	1	0	0
1	2021	0	74	0		0	0	0	1	0	0	0	0	0	0	0	0	0
0	2021	1	28	0		0	1	0	0	0	0	0	0	0	1	0	0	0
1	2021	0	49	0		0	0	0	1	0	0	0	0	0	0	0	0	0
0	2021	0	35	0		0	0	0	1	0	0	0	0	0	0	0	0	0
0	2021	0	73	0		0	0	0	1	0	0	0	0	0	1	0	0	0
1	2021	1	52	0		0	1	1	0	0	0	0	0	0	0	0	0	0
1	2021	1	9	0		0	1	0	1	0	0	0	0	0	0	0	0	0
0	2021	0	42	0		0	0	0	1	0	0	0	0	0	0	0	0	0
0	2021	0	32	0		0	0	0	0	0	0	1	0	0	0	0	0	0
0	2021	1	33	0		0	0	0	1	0	0	0	0	0	0	0	0	0
1	2021	0	64	0		0	0	0	0	0	0	0	0	0	1	0	0	0
0	2021	0	67	0		0	0	0	0	0	0	0	0	1	0	0	0	0
1	2021	0	32	0		0	0	0	1	0	0	0	0	0	0	0	0	0
0	2021	1	63	0		0	0	0	1	0	0	0	0	0	0	1	0	0
0	2021	0	20	0		0	0	0	0	0	0	0	0	0	0	1	0	0
0	2021	0	47	0		0	0	0	0	0	0	0	1	0	0	0	0	0
0	2021	0	46	0		0	0	0	1	0	0	1	0	0	0	0	0	0
0	2021	1	57	0		0	0	0	1	0	0	1	0	0	0	0	0	0
0	2021	0	29	0		0	1	0	0	0	0	0	1	0	0	0	0	0
1	2021	0	36	0		0	0	0	0	0	0	1	1	0	1	0	0	0
0	2021	0	24	0		0	0	0	1	0	0	0	0	0	0	0	0	0
0	2021	0	56	0		0	0	0	0	0	0	0	1	0	0	0	0	0
0	2021	0	23	0		0	1	0	0	0	0	0	0	1	0	0	0	0
1	2021	0	33	0		0	0	0	0	0	0	0	1	1	0	0	0	0
1	2021	0	27	0		0	1	0	0	0	1	0	0	0	0	0	0	0
0	2021	0	47	0		0	0	0	0	0	0	0	1	0	0	0	0	0
1	2021	1	41	0		0	0	0	1	0	0	0	0	0	0	0	0	0
0	2021	0	69	0		0	0	1	0	0	0	0	0	0	1	1	0	0
0	2021	1	60	0		0	0	0	1	0	0	0	0	0	0	1	0	0
1	2021	0	26	0		0	0	0	0	0	0	1	0	0	0	0	0	0
0	2021	0	48	0		0	0	0	0	0	0	1	0	0	0	0	0	0
0	2021	1	35	0		0	0	0	1	0	0	0	0	0	0	0	0	0
1	2021	0	67	0		0	0	0	1	0	0	0	0	0	0	0	0	0
1	2021	1	7	0		0	0	0	0	0	1	0	0	0	0	0	0	0
0	2021	0	26	0		0	0	0	0	0	0	0	0	0	0	1	0	0
1	2021	0	17	0		0	0	0	0	0	0	1	0	0	0	0	0	0
0	2021	0	28	0		0	0	0	0	0	0	0	1	1	0	0	0	0
0	2021	0	46	0		0	0	0	0	0	0	1	0	0	0	0	1	0
1	2021	0	67	0		0	0	0	1	0	0	0	0	0	1	0	0	0
0	2021	1	48	0		0	0	0	0	0	0	0	1	0	0	0	0	0
0	2021	1	59	0		0	0	0	1	0	0	0	0	0	0	0	0	0
1	2022	0	40	0		0	0	0	1	0	0	0	0	0	0	0	0	0
0	2022	1	62	0		0	0	0	0	0	0	0	0	1	0	0	0	0
1	2022	1	36	0		0	1	0	0	0	0	0	0	0	0	0	0	0
0	2022	0	69	0		0	0	0	1	0	0	0	0	0	0	0	0	0
0	2022	0	28	0		0	0	0	0	0	0	0	0	0	1	0	0	0
0	2022	0	65	0		0	0	1	0	0	0	0	0	0	1	0	0	0
0	2022	0	24	0		0	0	0	1	0	0	0	0	0	0	0	0	0
0	2022	0	63	0		0	0	0	1	0	0	0	0	0	0	1	0	0
1	2022	0	55	0		0	0	0	1	0	0	0	0	0	0	0	0	0
1	2022	0	21	0		0	0	0	1	0	0	0	0	0	0	0	0	0
0	2022	0	42	0		0	0	0	0	0	0	0	1	0	0	0	0	0
0	2022	0	18	0		0	0	0	1	0	0	0	0	0	0	0	0	0
0	2022	0	55	0		0	0	0	0	0	0	0	0	1	0	0	0	0
0	2022	1	39	0		0	0	1	0	0	0	0	0	0	0	0	0	0
0	2022	0	20	0		0	0	0	1	0	0	0	0	0	0	0	0	0
0	2022	0	52	0		0	0	0	0	0	0	0	0	0	0	1	0	0
1	2022	0	17	0		0	0	0	0	0	1	0	0	1	0	0	0	0
0	2022	0	13	0		0	0	0	1	0	0	0	0	0	0	0	0	0
1	2022	0	54	0		0	0	0	1	0	0	0	0	0	0	0	0	0
1	2022	0	70	0		0	0	0	0	0	0	0	0	0	1	1	0	0
0	2022	0	68	0		0	0	0	1	0	0	0	0	0	0	0	0	0
0	2022	0	25	0		0	0	0	1	0	0	0	0	0	0	0	0	0
0	2022	0	66	0		0	0	0	1	0	0	1	0	0	0	0	0	0
0	2022	1	72	0		0	0	0	0	0	0	1	0	0	0	0	0	0
0	2022	0	39	0		0	0	0	1	0	0	0	0	0	0	0	0	0
1	2022	0	33	0		0	0	0	0	0	0	0	1	0	0	0	0	0
1	2022	1	17	0		0	0	0	1	0	0	0	0	0	0	0	0	0
0	2022	0	23	0		0	0	0	1	0	0	0	0	0	0	0	0	0
0	2022	0	33	0		0	1	0	0	0	1	0	0	0	0	0	0	0
0	2022	0	73	0		0	1	0	0	0	0	0	0	0	0	0	0	0
0	2022	0	32	0		0	0	0	1	0	0	0	0	0	0	0	0	0
0	2022	0	18	0		0	0	0	0	0	0	0	1	0	0	0	0	0
1	2022	0	31	0		0	0	0	1	0	0	0	0	0	0	0	0	0
1	2022	0	28	0		0	0	1	0	0	0	0	0	0	0	0	0	0
0	2022	0	58	0		0	0	0	1	0	0	0	0	0	0	0	0	0
0	2022	0	45	0		0	0	0	1	0	0	0	0	0	0	0	0	0
0	2022	0	69	0		0	1	0	0	0	0	0	0	0	0	0	0	0
0	2022	0	55	0		0	0	0	1	0	0	0	0	0	0	0	0	1
0	2022	1	23	0		0	0	0	0	0	0	0	0	0	1	1	0	0
1	2022	1	62	0		0	0	0	0	0	0	0	0	1	0	0	0	0
0	2022	0	34	0		0	0	0	0	0	0	0	0	0	0	1	0	0
0	2022	0	25	0		0	0	0	1	0	0	0	1	0	0	0	0	0
1	2022	0	63	0		0	0	0	0	0	0	0	0	0	0	1	0	0
0	2022	0	34	0		0	0	1	0	0	0	0	0	1	0	1	0	0
0	2022	1	27	0		0	1	0	1	0	0	0	0	0	0	1	0	0
1	2022	0	31	0		0	1	0	0	0	0	0	0	0	0	1	0	0
0	2022	0	64	0		0	0	1	0	0	0	0	0	0	0	0	0	0
1	2022	0	38	0		0	0	0	1	0	0	0	0	0	0	0	0	0
0	2022	1	22	0		0	0	0	0	0	0	0	0	1	0	0	0	0
0	2022	1	28	0		0	0	0	1	0	0	0	0	0	0	1	0	0
0	2022	0	58	0		0	0	0	1	0	0	0	0	0	0	0	0	0
0	2022	0	14	0		0	0	0	0	0	0	1	0	0	0	0	0	0
0	2022	0	20	0		0	0	0	0	0	0	1	1	0	0	0	0	0
0	2022	1	20	0		0	0	0	1	0	0	0	0	0	0	0	0	0
0	2022	1	68	0		0	0	0	0	0	0	0	0	0	0	1	0	0
0	2022	0	50	0		0	0	0	0	0	0	1	0	0	0	0	0	0
1	2022	1	28	0		0	1	0	0	0	0	0	0	0	1	0	0	0
0	2022	1	73	0		0	0	0	1	0	0	0	0	0	1	0	0	0
1	2022	0	32	0		0	0	0	0	0	1	1	0	0	0	0	0	0
1	2022	0	33	0		0	1	0	0	0	0	0	0	0	0	1	0	0
0	2022	0	31	0		0	0	0	1	0	0	0	0	0	0	0	0	0
1	2022	0	33	0		0	0	0	0	1	0	0	1	0	0	0	0	0
1	2022	0	69	0		0	1	0	0	0	0	0	0	0	0	1	0	0
0	2022	0	33	0		0	0	1	0	0	0	0	0	0	0	0	0	0
0	2022	0	70	0		0	0	0	0	0	0	0	0	1	0	0	0	0
0	2022	1	67	0		0	0	0	1	0	0	0	0	0	1	0	0	0
0	2022	1	21	0		0	0	0	0	0	0	0	1	0	0	0	0	0
0	2022	0	26	0		0	0	0	0	0	0	0	1	1	0	0	0	0
1	2022	1	30	0		0	0	0	0	0	1	0	0	0	0	0	0	0
0	2022	0	16	0		0	0	0	1	0	0	0	0	0	0	1	0	0
1	2022	1	77	0		0	0	0	1	0	0	0	0	0	1	0	0	0
1	2022	1	49	0		0	0	0	0	0	0	0	1	1	0	0	0	0
1	2022	0	66	0		0	1	1	0	0	0	0	0	0	0	0	0	0
1	2022	0	63	0		0	0	0	0	0	0	0	1	0	1	0	0	0
0	2022	0	36	0		0	0	0	1	0	0	0	0	0	0	0	0	0
0	2022	0	64	0		0	0	1	0	0	0	0	0	0	0	1	0	0
1	2022	0	29	0		0	0	1	0	0	0	0	1	0	0	0	0	0
0	2022	0	33	0		0	0	0	0	0	0	0	0	0	1	1	0	0
0	2022	0	65	0		0	1	0	0	0	0	0	0	0	0	0	0	0
0	2022	0	50	0		0	0	0	1	0	0	0	0	0	0	0	0	0
0	2022	0	20	0		0	0	0	0	0	0	0	0	0	0	1	0	0
1	2022	0	28	0		0	0	0	1	0	0	0	0	0	0	0	0	0
0	2022	0	34	0		0	0	0	1	0	0	0	0	0	0	0	0	0
1	2022	1	39	0		0	0	0	1	0	0	0	0	0	0	0	0	0
0	2022	0	31	0		0	0	0	0	0	0	0	1	0	0	0	0	0
0	2022	0	58	0		0	0	0	0	0	0	0	0	0	1	0	0	0
1	2022	0	61	0		0	0	0	1	0	0	0	0	0	0	1	0	0
0	2022	1	79	0		0	0	0	0	0	0	0	0	1	1	1	0	0
0	2022	1	31	0		0	0	0	1	0	0	0	0	0	0	0	0	0
1	2022	1	35	0		0	0	0	0	0	0	0	1	0	0	0	0	0
1	2022	0	29	0		0	0	0	1	0	0	0	0	0	0	0	0	0
0	2022	0	37	0		0	0	0	0	0	0	0	1	0	0	0	0	0
1	2022	0	17	0		0	0	0	0	0	0	0	0	0	1	0	0	0
1	2022	0	51	0		0	0	0	1	0	0	0	0	0	0	0	0	0
1	2022	1	36	0		0	0	0	1	0	1	0	0	0	0	0	0	0
0	2022	1	63	0		0	0	0	1	0	0	0	0	0	0	0	0	0
1	2022	0	44	0		0	0	0	0	0	0	0	1	0	1	0	0	0
0	2022	0	42	0		0	0	0	0	0	0	0	0	0	0	1	1	0
1	2022	0	73	0		0	0	0	0	0	1	0	0	0	0	0	0	0
0	2022	0	57	0		0	0	0	1	0	0	0	0	0	0	0	0	0
0	2022	0	25	0		0	0	0	0	0	1	0	0	0	0	0	0	0
1	2022	0	57	0		0	0	0	1	0	0	0	0	0	0	0	0	0
1	2022	1	58	0		0	0	0	1	0	0	0	1	0	0	0	0	0
0	2022	0	59	0		0	0	0	1	0	0	1	0	0	0	0	0	0
0	2022	0	15	0		0	0	0	1	0	0	0	0	0	0	0	0	0
1	2022	0	18	0		0	0	0	0	0	0	1	0	0	0	0	0	0
1	2022	1	34	0		0	0	0	0	0	0	0	1	0	0	0	0	0
1	2022	0	20	0		0	0	0	1	0	0	0	0	0	0	0	0	0
0	2022	0	19	0		0	0	0	0	0	0	0	1	0	0	0	0	0
0	2022	0	52	0		0	0	0	1	0	0	0	0	0	1	1	1	0
0	2022	0	30	0		0	0	0	1	0	0	0	0	0	0	0	0	0
0	2022	0	42	0		0	0	0	1	0	0	0	0	0	0	0	0	0
0	2022	0	66	0		0	0	1	0	0	0	0	0	0	0	0	0	0
0	2022	0	42	0		0	0	1	0	0	0	0	0	1	0	0	0	0
0	2022	0	64	0		0	0	0	0	0	0	1	0	0	0	0	0	0
0	2022	1	62	0		0	0	0	1	0	0	0	0	0	0	0	0	0
0	2016	0	41	0		0	0	0	1	0	0	0	0	0	0	0	0	0
0	2016	0	67	0		0	0	0	0	0	1	0	0	0	0	0	0	0
0	2016	1	19	0		0	0	0	0	0	0	1	0	0	0	0	0	0
0	2016	0	35	0		0	0	1	0	0	0	0	0	0	1	0	0	0
1	2016	0	12	0		0	0	0	1	0	0	0	0	0	0	0	0	0
0	2016	0	33	0		0	0	0	1	0	0	0	0	0	0	0	0	0
0	2016	1	10	0		0	0	0	1	0	0	0	0	0	0	0	0	0
0	2016	1	26	0		0	0	0	1	0	0	0	0	0	0	0	0	0
0	2016	1	24	0		0	1	0	0	0	0	0	0	0	0	0	0	0
1	2016	1	67	0		0	0	0	1	0	0	0	0	0	1	1	0	0
1	2016	0	21	0		0	0	0	0	0	0	0	1	0	1	0	0	0
0	2016	0	27	0		0	0	0	0	0	0	0	0	0	0	1	0	0
0	2016	0	38	0		0	0	0	0	0	0	0	0	1	0	0	0	0
1	2016	0	33	0		0	0	0	0	0	0	0	1	0	0	0	0	0
0	2016	0	58	0		0	0	0	1	0	0	0	0	0	1	1	1	0
0	2016	1	72	0		0	0	0	0	0	0	0	1	1	0	0	1	0
0	2016	0	54	0		0	0	0	0	0	1	1	0	0	0	0	0	0
0	2016	0	68	0		0	1	0	0	0	0	0	0	0	1	0	0	0
0	2016	0	72	0		0	0	0	0	0	0	0	1	0	0	0	0	0
0	2016	0	43	0		0	0	0	0	0	0	0	0	1	0	0	0	0
1	2016	0	32	0		0	0	0	0	0	0	0	1	1	0	0	0	0
0	2016	1	64	0		0	1	0	0	0	0	0	0	0	0	0	0	0
0	2016	0	69	0		0	0	0	0	0	0	0	0	1	1	0	0	0
0	2016	1	29	0		0	0	0	1	0	0	0	0	0	0	0	0	0
1	2016	1	45	0		0	0	0	1	0	0	0	0	0	0	0	0	0
0	2016	0	35	0		0	1	0	0	0	0	0	0	1	0	0	0	0
0	2016	0	66	0		0	0	0	0	0	0	0	1	0	0	0	0	0
0	2016	0	23	0		0	0	0	0	0	0	1	0	0	0	0	0	0
0	2016	1	31	0		0	0	0	0	0	0	0	0	1	0	1	0	0
0	2016	0	34	0		0	0	0	1	0	0	0	0	0	0	0	0	0
0	2016	0	56	0		0	0	1	0	0	0	0	0	0	0	0	0	0
0	2016	0	34	0		0	0	0	0	0	0	0	0	0	0	1	0	0
0	2016	0	73	0		0	0	0	0	0	0	0	0	1	0	0	0	0
0	2016	0	70	0		0	1	0	0	0	0	0	1	0	0	0	0	0
0	2016	0	75	0		0	0	0	0	0	0	0	0	1	0	0	0	0
0	2016	0	31	0		0	0	0	1	0	0	0	0	0	0	0	0	0
0	2016	0	39	0		0	0	0	0	0	0	0	0	0	0	1	0	0
0	2016	0	25	0		0	0	0	0	0	0	0	0	0	1	0	0	0
0	2016	1	56	0		0	0	0	0	0	0	0	0	0	1	0	0	0
0	2016	0	30	0		0	0	1	1	0	0	0	0	0	0	0	0	0
0	2016	1	33	0		0	0	1	0	0	0	1	0	0	0	0	0	0
0	2016	1	33	0		0	0	0	0	0	0	0	0	0	0	1	0	0
0	2016	0	40	0		0	0	0	1	0	0	0	0	0	0	0	0	0
1	2016	0	75	0		0	0	0	0	0	0	1	0	1	0	0	0	0
0	2016	0	39	0		0	0	0	0	0	0	0	0	0	1	0	0	0
0	2016	0	61	0		0	0	0	1	0	0	0	0	0	0	0	0	0
1	2016	0	76	0		0	0	0	0	0	0	0	0	1	0	0	0	0
0	2016	0	64	0		0	0	0	0	0	0	0	0	1	0	0	0	0
1	2016	0	16	0		0	1	0	0	0	0	0	0	0	0	0	0	0
0	2016	0	30	0		0	0	0	1	0	1	0	0	0	0	0	0	0
0	2016	1	38	0		0	0	0	1	0	0	0	0	0	0	0	0	0
0	2016	0	31	0		0	0	0	0	0	0	0	1	0	0	0	0	0
1	2016	0	15	0		0	0	0	0	0	0	1	1	0	0	0	0	0
1	2016	0	33	0		0	0	0	1	0	0	0	0	0	0	0	0	0
1	2016	0	30	0		0	0	0	1	0	0	0	0	0	0	0	0	0
1	2016	0	29	0		0	0	0	0	0	0	1	0	0	0	0	1	0
1	2016	0	37	0		0	0	0	0	0	0	1	0	0	0	0	0	0
0	2016	1	39	0		0	0	0	0	0	0	1	0	0	0	0	0	0
0	2016	0	45	0		0	0	0	0	0	0	1	0	0	0	0	0	0
1	2016	0	57	0		0	0	0	0	0	0	0	0	0	1	1	0	0
0	2016	1	25	0		0	0	1	1	0	0	0	0	0	0	0	0	0
1	2016	1	9	0		0	0	0	1	0	0	0	0	0	0	1	0	0
1	2016	0	31	0		0	0	1	1	0	0	0	1	0	0	0	0	0
0	2016	0	40	0		0	0	0	0	0	1	0	0	0	0	0	0	0
1	2016	0	38	0		0	0	0	1	0	0	0	0	0	0	1	0	0
1	2016	0	28	0		0	0	1	1	0	0	0	0	1	0	1	0	0
1	2016	0	11	0		0	0	1	1	1	0	0	0	0	0	0	0	0
1	2016	0	61	0		0	0	0	0	0	0	1	0	0	0	0	0	0
0	2016	0	27	0		0	0	0	1	0	0	0	0	0	0	0	0	0
1	2016	1	17	0		0	0	0	1	0	0	0	0	0	0	0	0	0
0	2016	0	49	0		0	0	0	0	0	0	0	0	0	1	0	1	0
0	2016	1	31	0		0	0	0	0	1	0	0	0	0	0	1	0	0
0	2016	0	61	0		0	0	0	0	0	0	0	0	1	0	0	0	0
0	2016	1	31	0		0	0	0	1	0	0	1	0	0	0	0	0	0
0	2016	0	34	0		0	0	1	0	0	0	0	0	0	0	0	0	0
0	2016	1	64	0		0	0	0	1	0	1	0	0	0	0	0	0	0
0	2016	0	33	0		0	0	0	0	0	0	0	0	1	0	0	0	0
0	2016	0	34	0		0	0	0	0	0	0	0	0	1	0	0	0	0
0	2016	0	60	0		0	0	0	1	0	0	0	0	0	0	0	0	0
0	2016	0	76	0		0	0	0	1	0	0	1	0	0	0	0	0	0
0	2016	0	24	0		0	0	0	1	0	0	0	0	0	0	0	0	0
0	2016	0	47	0		0	0	0	1	1	0	0	0	0	0	0	0	0
0	2016	0	43	0		0	0	1	0	0	0	0	0	0	0	1	0	0
0	2016	0	65	0		0	0	0	0	0	0	0	0	0	1	0	0	0
0	2016	0	24	0		0	0	0	0	0	0	1	0	0	0	0	0	0
1	2016	0	26	0		0	0	0	1	0	0	0	0	0	0	0	0	0
1	2015	0	43	0		0	0	0	0	0	0	0	1	0	0	0	0	0
0	2015	0	32	0		0	0	0	1	0	0	0	0	0	1	1	0	0
0	2015	1	30	0		0	0	0	1	0	0	0	0	0	0	0	0	0
0	2015	0	29	0		0	0	0	1	0	0	0	0	1	0	0	0	0
0	2015	1	33	0		0	0	0	0	0	0	1	0	0	0	0	0	0
0	2015	0	29	0		0	0	1	0	0	0	0	0	0	0	0	0	0
0	2015	0	66	0		0	0	0	0	0	0	0	0	0	1	0	0	0
0	2015	1	27	0		0	0	1	0	0	0	0	0	1	0	0	0	0
0	2015	0	35	0		0	0	0	0	0	0	0	0	1	0	0	0	0
0	2015	0	35	0		0	0	0	0	0	1	0	0	0	1	0	0	0
0	2015	0	29	0		0	0	0	0	0	0	0	0	1	1	0	0	0
0	2015	1	60	0		0	1	0	0	0	0	0	0	0	0	0	0	0
0	2015	1	31	0		0	0	0	0	0	0	0	1	0	0	0	1	0
0	2015	1	62	0		0	0	0	0	0	0	0	0	1	0	0	0	0
0	2015	0	30	0		0	0	0	1	0	0	0	0	1	0	0	0	0
0	2015	0	31	0		0	0	0	1	0	0	0	0	1	0	0	0	0
0	2015	1	71	0		0	0	0	0	1	0	0	0	0	0	0	0	0
0	2015	0	66	0		0	0	0	1	0	0	0	0	0	0	0	0	0
0	2015	0	58	0		0	0	0	0	0	0	0	0	0	1	0	0	0
0	2015	1	53	0		0	0	0	0	0	0	0	0	0	0	1	0	0
0	2015	1	50	0		0	0	0	0	0	0	0	0	0	1	1	0	0
0	2015	0	33	0		0	0	1	1	0	0	0	0	0	0	0	0	0
0	2015	1	24	0		0	0	0	0	0	0	0	0	0	1	1	0	0
0	2015	0	53	0		0	0	0	1	0	0	0	0	0	0	0	0	0
0	2015	1	24	0		0	1	0	1	0	0	0	0	0	1	0	0	0
0	2015	0	37	0		0	1	0	0	0	0	0	0	1	0	0	0	0
1	2015	0	42	0		0	0	1	1	0	0	1	0	0	0	0	0	0
0	2015	1	66	0		0	0	0	1	0	0	0	0	0	0	0	0	0
0	2015	0	69	0		0	0	0	1	0	0	0	0	0	0	0	0	0
0	2015	0	27	0		0	0	0	1	0	0	0	0	0	0	0	0	0
0	2015	0	30	0		0	0	1	1	0	0	0	0	0	1	0	0	0
0	2015	0	37	0		0	0	0	0	0	0	0	0	0	1	0	0	0
0	2015	0	54	0		0	0	0	0	0	0	1	0	0	0	0	0	0
0	2015	0	41	0		0	0	0	1	0	0	1	0	1	0	0	0	0
0	2015	0	67	0		0	1	0	1	0	0	0	0	0	0	0	0	0
0	2015	0	27	0		0	0	0	0	0	1	0	1	0	0	0	0	0
0	2015	0	13	0		0	0	0	1	0	0	0	0	0	0	0	0	0
0	2015	0	29	0		0	0	0	1	0	0	1	0	0	0	0	0	0
0	2015	0	73	0		0	0	0	0	0	0	1	1	1	0	0	0	0
1	2015	0	50	0		0	0	0	1	0	0	0	0	1	0	0	0	0
0	2015	0	30	0		0	0	0	0	0	1	0	1	0	0	0	0	0
0	2015	0	34	0		0	0	0	1	0	0	0	0	0	1	0	0	0
0	2015	0	29	0		0	0	0	1	0	0	0	0	0	0	0	0	0
0	2015	0	30	0		0	0	1	1	0	0	0	0	0	0	0	0	0
0	2015	0	31	0		0	0	1	0	0	0	0	0	0	0	0	0	0
0	2015	1	57	0		0	0	0	1	0	0	0	0	1	0	0	0	0
0	2015	1	58	0		0	0	0	1	0	0	0	1	0	1	0	0	0
0	2015	0	31	0		0	0	0	0	0	0	1	0	0	0	0	0	0
0	2015	0	74	0		0	0	0	0	0	0	1	0	0	0	0	0	0
0	2015	1	61	0		0	0	0	1	0	0	0	0	0	0	0	0	0
0	2015	0	31	0		0	0	0	0	1	0	0	0	0	0	0	0	0
0	2015	0	31	0		0	0	1	1	0	0	0	0	0	0	0	0	0
0	2015	1	27	0		0	0	0	1	0	0	0	0	0	0	0	0	0
0	2015	1	70	0		0	0	0	0	0	0	0	1	1	0	0	0	0
0	2015	0	24	0		0	0	0	0	0	1	0	0	0	0	0	0	0
0	2015	0	31	0		0	0	0	1	0	0	0	0	0	0	0	0	0
0	2015	0	37	0		0	0	0	0	0	0	1	1	0	0	0	0	0
0	2015	0	70	0		0	0	0	1	0	0	0	0	0	0	0	0	0
0	2015	0	36	0		0	0	1	0	0	0	0	0	1	0	0	0	0
0	2015	0	40	0		0	0	0	0	0	0	1	0	0	0	0	0	0
0	2015	0	38	0		0	0	0	1	0	0	0	0	0	0	1	1	0
1	2015	0	38	0		0	0	0	0	0	1	0	0	0	1	0	0	0
0	2015	0	32	0		0	0	1	0	0	0	0	1	0	0	0	0	0
0	2015	0	30	0		0	0	0	0	0	1	0	0	0	0	0	0	0
0	2015	0	59	0		0	0	0	1	0	0	0	0	0	0	0	0	0
0	2015	0	40	0		0	0	0	0	0	1	0	0	0	0	0	0	0
0	2015	0	43	0		0	0	0	0	0	0	1	0	0	0	0	0	0
0	2015	0	40	0		0	0	0	1	0	0	0	0	0	0	0	0	0
0	2015	0	74	0		0	0	0	0	0	0	0	1	0	0	0	0	0
0	2015	0	14	0		0	0	0	0	0	0	0	0	1	0	0	0	0
0	2015	0	35	0		0	0	1	1	0	0	0	0	0	0	0	0	0
0	2015	1	30	0		0	1	0	0	0	0	0	0	0	0	1	0	0
0	2015	0	43	0		0	0	1	1	0	0	0	0	0	0	0	0	0
1	2015	0	39	0		0	0	0	0	0	0	0	0	1	0	1	0	0
0	2015	0	40	0		0	0	0	0	0	0	1	0	0	0	0	0	0
0	2015	0	25	0		0	0	0	0	0	0	1	0	0	0	0	0	0
0	2015	0	45	0		0	0	0	1	0	0	0	0	0	0	0	0	0
0	2015	0	62	0		0	0	0	0	0	0	0	0	0	1	1	0	0
0	2015	0	62	0		0	0	0	0	0	0	0	0	1	0	0	0	0
0	2015	0	32	0		0	0	1	0	0	0	0	0	0	0	0	0	0
0	2015	0	58	0		0	1	0	1	0	0	0	0	0	1	0	0	0
0	2015	0	35	0		0	0	0	0	0	0	0	0	0	0	1	0	0
0	2015	1	57	0		0	0	0	1	0	0	0	0	1	0	0	0	0
0	2015	0	55	0		0	0	0	0	0	0	1	0	0	0	0	0	0
0	2015	0	21	0		0	0	0	1	0	0	0	0	0	0	0	0	0
0	2015	0	47	0		0	0	0	1	0	0	0	0	0	0	0	0	0
0	2015	1	27	0		0	0	0	1	0	0	0	0	0	0	0	0	0
0	2015	0	24	0		0	0	0	1	0	0	1	0	0	0	0	0	0
0	2015	0	62	0		0	0	0	0	0	0	0	0	1	0	0	0	0
0	2015	1	27	0		0	0	0	1	0	0	0	0	0	0	0	0	0
0	2015	0	25	0		0	0	1	1	0	0	0	0	0	0	0	0	0
0	2015	0	31	0		0	0	0	0	0	0	0	0	1	0	0	0	0
0	2015	1	31	0		0	0	0	0	0	0	0	0	1	0	0	0	0
0	2015	0	16	0		0	1	0	0	0	0	0	0	0	0	0	0	0
0	2014	1	35	0		0	1	0	0	0	0	0	0	0	0	0	0	0
0	2014	0	40	0		0	0	0	1	0	0	0	0	0	0	0	0	0
0	2014	0	39	0		0	1	0	0	0	0	0	0	0	1	0	0	0
0	2014	0	31	0		0	0	0	0	0	1	0	0	0	0	0	0	0
0	2014	0	69	0		0	0	1	0	0	1	0	0	1	0	0	0	0
0	2014	1	71	0		0	0	0	1	0	0	0	0	0	0	0	0	0
0	2014	0	63	0		0	0	0	1	0	0	0	0	0	0	0	0	0
0	2014	0	66	0		0	0	0	0	1	0	0	0	1	0	0	0	0
0	2014	0	60	0		0	0	0	0	0	0	0	0	1	0	0	0	0
0	2014	0	54	0		0	0	0	0	0	0	0	0	1	0	0	0	0
0	2014	0	39	0		0	0	0	0	0	0	0	1	1	0	0	0	0
0	2014	0	61	0		0	0	0	1	0	0	1	0	0	0	0	0	0
0	2014	0	45	0		0	0	0	1	0	0	0	0	0	0	0	0	0
0	2014	0	31	0		0	0	0	1	0	0	0	0	1	0	0	0	0
0	2014	1	30	0		0	1	0	0	0	0	1	0	0	0	0	0	0
1	2014	0	46	0		0	1	1	0	0	0	0	0	0	0	0	0	0
0	2014	1	30	0		0	0	1	0	0	0	0	1	0	0	0	0	0
0	2014	0	30	0		0	0	0	0	0	0	0	0	0	0	1	0	0
0	2014	0	67	0		0	0	0	1	0	0	0	0	0	0	0	0	0
0	2014	0	72	0		0	0	0	0	0	0	1	1	0	0	0	0	0
0	2014	0	16	0		0	0	0	0	0	1	0	0	0	0	0	0	0
0	2014	0	31	0		0	0	0	1	0	0	0	0	0	0	0	0	0
0	2014	0	69	0		0	0	1	0	0	0	0	0	0	1	0	0	0
0	2014	0	37	0		0	0	1	1	0	1	0	0	0	0	0	0	0
0	2014	0	29	0		0	1	1	1	0	0	0	0	0	0	0	0	0
0	2014	0	62	0		0	0	0	0	0	0	1	0	0	0	0	0	0
0	2014	0	62	0		0	0	0	1	0	0	0	0	0	0	0	0	0
1	2014	0	36	0		0	0	0	1	0	0	0	0	0	0	1	0	0
0	2014	0	49	0		0	0	0	1	0	0	1	0	1	0	0	0	0
0	2014	0	54	0		0	1	0	1	0	0	0	0	1	1	0	0	0
0	2014	0	67	0		0	0	0	0	0	0	1	0	0	0	0	0	0
0	2014	0	39	0		0	0	0	0	0	0	0	0	0	0	1	0	0
0	2014	1	56	0		0	0	1	1	0	0	0	0	0	0	0	0	0
0	2014	0	66	0		0	0	0	0	1	0	0	0	0	0	1	1	0
0	2014	1	74	0		0	0	0	1	1	0	0	0	0	0	1	0	0
0	2014	0	69	0		0	0	1	0	0	0	1	0	0	0	0	0	0
0	2014	0	65	0		0	0	0	0	0	1	0	0	0	0	0	0	0
0	2014	0	72	0		0	0	1	0	0	0	0	0	1	0	0	0	0
0	2014	0	53	0		0	0	0	0	0	0	0	0	1	0	0	0	0
0	2014	0	66	0		0	0	0	1	0	1	0	0	0	0	0	0	0
0	2014	0	67	0		0	0	0	0	0	0	0	0	1	0	0	0	0
1	2014	1	10	0		0	0	0	1	0	0	0	0	0	0	0	0	0
0	2014	0	45	0		0	0	0	1	0	0	1	0	0	0	0	0	0
0	2014	0	27	0		0	0	0	0	0	0	0	1	0	0	0	0	0
0	2014	0	55	0		0	0	0	0	1	0	0	0	0	1	0	0	0
0	2014	0	29	0		0	1	0	1	0	0	0	0	0	0	0	1	0
1	2014	1	21	0		0	0	0	0	0	0	0	0	0	0	1	0	0
0	2014	0	29	0		0	0	0	0	0	0	0	0	0	0	1	0	0
1	2014	1	51	0		0	0	0	0	0	0	0	1	0	0	0	1	0
0	2014	0	28	0		0	1	0	0	0	0	1	0	0	0	0	0	0
1	2014	1	38	0		0	0	0	0	0	0	0	0	1	0	0	0	0
1	2014	0	21	0		0	0	0	0	0	0	0	1	1	0	0	1	0
0	2014	0	32	0		0	0	0	0	0	0	0	0	1	0	0	0	0
1	2014	0	44	0		0	1	0	1	0	0	0	1	0	1	0	1	0
1	2014	0	42	0		0	0	0	1	0	0	0	0	0	1	1	0	0
0	2014	0	38	0		0	0	0	1	0	0	0	0	0	0	0	0	0
0	2014	0	32	0		0	0	0	0	0	0	1	0	0	0	0	0	0
0	2014	1	32	0		0	0	0	1	0	0	1	0	0	0	0	0	0
0	2014	1	43	0		0	0	0	1	0	0	0	0	1	0	0	0	0
0	2014	1	46	0		0	0	0	1	0	0	0	0	0	0	0	0	0
0	2014	0	59	0		0	0	0	0	0	0	0	0	0	1	1	0	0
0	2014	1	31	0		0	0	0	0	0	0	1	1	0	0	0	0	0
0	2014	0	53	0		0	0	0	1	0	1	0	0	0	0	0	0	0
0	2014	0	39	0		0	0	1	0	0	0	0	0	0	1	0	0	0
0	2014	1	22	0		0	0	1	0	0	0	0	0	0	1	0	0	0
0	2014	0	60	0		0	0	0	1	0	0	0	0	0	0	0	0	0
1	2014	1	31	0		0	1	0	0	0	0	0	0	0	0	0	0	0
1	2014	0	33	0		0	0	1	1	0	0	0	0	0	0	0	0	0
0	2014	0	26	0		0	0	1	0	0	0	0	0	0	0	0	0	0
0	2014	0	28	0		0	0	0	1	0	0	0	0	0	0	0	0	0
0	2014	0	57	0		0	0	0	0	0	0	0	0	0	1	1	0	0
0	2014	1	21	0		0	0	0	1	0	0	0	0	0	0	0	0	0
1	2014	0	25	0		0	0	1	1	0	0	0	0	0	0	0	0	0
0	2014	1	34	0		0	0	1	1	0	0	0	0	0	0	0	0	0
0	2014	0	30	0		0	0	0	1	0	0	0	0	0	0	0	0	0
0	2014	0	55	0		0	0	0	1	0	0	0	0	0	0	0	0	0
0	2014	0	29	0		0	0	0	1	0	0	0	0	0	0	0	0	0
0	2014	0	57	0		0	0	0	0	0	0	1	0	0	0	0	0	0
0	2014	0	70	0		0	0	0	1	0	0	0	0	0	0	0	0	0
0	2014	0	32	0		0	0	0	0	0	0	1	0	0	0	0	0	0
0	2014	1	36	0		0	0	1	0	0	0	0	0	0	1	0	0	0
1	2014	1	75	0		0	0	1	0	0	0	1	0	0	1	0	0	0
0	2014	0	37	0		0	0	0	1	0	0	0	0	0	0	0	0	0
0	2014	0	32	0		0	0	0	0	0	0	0	1	0	0	0	0	0
0	2014	0	31	0		0	0	0	1	0	0	0	0	0	0	0	0	0
0	2014	0	31	0		0	0	0	1	0	0	1	0	0	0	1	0	0
0	2014	0	26	0		0	0	0	0	0	0	1	0	0	0	0	0	0
0	2014	0	53	0		0	0	0	0	0	0	0	1	0	0	0	0	0
0	2014	0	25	0		0	0	0	1	0	0	0	0	0	0	0	0	0
0	2014	1	32	0		0	0	0	0	0	0	0	1	0	0	0	0	0
0	2014	1	29	0		0	0	0	0	0	0	0	0	0	1	0	0	0
0	2014	1	28	0		0	0	1	1	0	0	0	0	0	0	0	0	0
0	2014	0	50	0		0	0	0	1	0	0	0	0	0	0	1	0	0
0	2014	0	40	0		0	0	0	1	0	0	0	0	0	0	0	0	0
0	2014	1	31	0		0	0	0	0	0	1	0	0	0	0	0	0	0
0	2014	0	38	0		0	0	0	1	0	0	0	0	0	0	0	0	0
0	2014	0	33	0		0	1	0	0	0	0	0	0	0	1	0	0	0
0	2014	0	23	0		0	0	1	0	1	0	0	0	0	0	1	0	0
0	2014	0	22	0		0	0	0	0	0	0	0	0	0	1	0	0	0
0	2014	0	47	0		0	0	0	0	0	0	0	1	0	0	0	0	0
0	2014	1	26	0		0	0	1	0	1	0	0	1	1	0	0	0	0
0	2014	1	29	0		0	0	0	0	0	0	1	0	0	0	0	0	0
0	2014	1	19	0		0	0	0	0	0	0	0	0	0	1	1	0	0
0	2013	1	31	0		0	0	0	1	0	0	0	1	1	0	0	0	0
0	2013	0	67	0		0	0	1	0	0	0	0	0	1	0	0	0	0
1	2013	0	14	0		0	0	1	0	0	0	0	1	0	0	0	0	0
0	2013	0	36	0		0	0	0	0	0	0	1	0	0	0	0	0	0
0	2013	0	65	0		0	0	1	0	0	0	0	0	1	0	0	0	0
0	2013	0	33	0		0	0	0	0	0	0	0	0	1	0	0	0	0
0	2013	1	48	0		0	0	0	0	0	0	0	0	1	1	0	0	0
0	2013	0	35	0		0	1	1	1	0	0	0	0	0	0	0	0	0
1	2013	1	31	0		0	0	0	0	0	0	1	0	0	0	0	0	0
0	2013	1	67	0		0	0	0	1	0	0	0	0	0	0	1	0	0
0	2013	0	71	0		0	0	0	0	0	0	1	0	0	0	0	0	0
0	2013	0	61	0		0	1	0	0	0	0	0	0	0	0	0	0	0
0	2013	0	33	0		0	0	0	0	0	1	1	1	0	0	0	0	0
0	2013	0	31	0		0	0	0	0	0	0	0	1	0	0	0	0	0
0	2013	1	42	0		0	0	0	1	0	0	0	0	0	0	0	0	0
0	2013	0	62	0		0	0	0	0	0	0	0	0	1	0	0	0	0
0	2013	0	58	0		0	0	0	0	0	0	0	0	1	0	0	0	0
0	2013	0	39	0		0	0	0	0	0	1	0	0	0	0	0	0	0
0	2013	0	53	0		0	0	0	1	0	0	0	0	0	0	1	0	0
0	2013	0	25	0		0	0	0	0	0	0	0	0	1	0	0	0	0
0	2013	1	6	0		0	0	0	0	0	0	0	0	1	0	0	0	0
0	2013	1	32	0		0	0	1	1	0	0	0	0	0	0	0	0	0
0	2013	0	62	0		0	1	0	1	1	0	0	0	0	0	0	0	0
0	2013	1	73	0		0	1	0	1	1	0	0	0	0	0	0	0	0
0	2013	1	31	0		0	0	0	1	0	0	0	0	0	0	0	0	0
0	2013	1	18	0		0	1	1	0	0	0	0	0	0	0	1	0	0
0	2013	1	61	0		0	0	0	0	0	1	0	0	0	0	0	0	0
0	2013	1	61	0		0	0	0	0	0	0	0	0	1	0	0	0	0
0	2013	1	70	0		0	0	1	1	0	0	0	0	0	0	0	1	0
0	2013	1	63	0		0	0	0	1	0	0	0	0	0	0	0	0	0
0	2013	0	27	0		0	0	0	1	0	0	0	0	0	0	0	0	0
0	2013	0	28	0		0	0	0	0	0	0	0	0	1	0	0	0	0
0	2013	0	25	0		0	0	0	0	0	0	0	0	1	0	0	0	0
1	2013	0	68	0		0	0	0	0	0	0	0	0	1	0	0	0	0
0	2013	0	58	0		0	0	0	0	0	0	0	0	1	0	0	0	0
1	2013	0	67	0		0	0	0	0	0	0	0	0	1	0	0	0	0
0	2013	1	32	0		0	0	0	0	0	0	0	0	1	0	0	0	0
1	2013	0	23	0		0	0	0	0	0	0	0	0	1	0	0	0	0
0	2013	1	33	0		0	0	0	1	0	0	0	0	1	0	0	0	0
1	2013	0	26	0		0	0	0	0	0	0	0	0	1	0	0	0	0
0	2013	1	36	0		0	0	0	0	0	1	0	0	0	0	0	0	0
0	2013	0	38	0		0	0	0	0	0	0	0	1	0	0	0	0	0
0	2013	1	19	0		0	0	0	1	0	0	0	0	0	0	0	0	0
0	2013	1	42	0		0	0	0	0	0	0	1	0	0	0	0	0	0
0	2013	0	32	0		0	0	0	0	0	0	0	0	1	0	0	0	0
0	2013	0	33	0		0	0	0	1	0	0	0	0	0	1	0	0	0
0	2013	1	37	0		0	0	0	1	0	0	0	0	0	0	0	0	0
0	2013	0	55	0		0	1	0	0	0	0	0	0	0	0	0	0	0
0	2013	0	43	0		0	1	0	0	0	0	0	0	0	1	0	0	0
0	2013	0	29	0		0	0	0	1	0	1	1	0	0	0	0	0	0
0	2013	0	69	0		0	0	0	1	0	0	0	0	0	0	0	0	0
0	2013	0	32	0		0	0	0	1	0	0	0	0	0	0	0	0	0
0	2013	0	39	0		0	0	0	1	0	0	0	0	0	0	0	0	0
0	2013	0	30	0		0	0	0	1	0	0	0	0	0	0	0	0	0
0	2013	0	22	0		0	0	0	1	0	0	0	0	0	0	0	0	0
0	2013	0	26	0		0	0	0	1	0	0	0	0	0	0	0	1	0
0	2013	0	34	0		0	0	0	0	0	0	0	1	0	0	0	0	0
0	2013	1	20	0		0	0	0	0	0	0	0	1	0	0	1	0	0
0	2013	0	32	0		0	0	0	0	0	0	0	0	0	0	1	0	0
1	2013	1	17	0		0	0	0	0	0	0	1	1	0	0	0	0	0
0	2013	1	38	0		0	0	0	0	0	0	1	0	0	0	0	0	0
1	2013	0	63	0		0	0	1	1	0	0	0	0	0	0	0	0	0
0	2013	0	30	0		0	0	0	0	0	0	0	0	1	0	1	0	0
0	2013	0	53	0		0	0	0	0	0	0	0	0	0	1	0	0	0
0	2013	0	50	0		0	0	0	1	0	0	1	0	0	0	0	0	0
1	2013	0	44	0		0	1	0	0	0	0	0	0	0	0	0	0	1
0	2013	0	39	0		0	0	1	0	0	0	0	0	0	0	0	0	0
0	2013	1	64	0		0	0	0	0	0	0	1	0	0	0	0	0	0
0	2013	1	31	0		0	0	1	0	0	0	0	1	0	0	0	0	0
0	2013	0	33	0		0	0	0	0	0	0	1	0	0	0	0	0	0
0	2013	0	32	0		0	0	0	0	0	0	0	1	0	0	0	0	0
0	2013	0	29	0		0	0	0	1	0	1	0	0	0	0	0	0	0
0	2013	0	50	0		0	0	0	1	0	0	0	0	0	0	0	0	0
0	2013	1	29	0		0	0	0	1	0	0	0	0	0	0	0	0	0
0	2013	1	11	0		0	0	0	0	0	0	1	0	0	0	0	0	0
0	2013	0	29	0		0	0	0	1	0	1	0	0	0	0	0	0	0
0	2013	0	62	0		0	0	0	0	0	0	1	0	0	0	0	0	0
1	2013	0	60	0		0	0	0	1	0	0	0	0	0	0	1	0	0
1	2013	0	41	0		0	0	0	1	0	0	0	0	0	0	0	0	0
0	2013	0	29	0		0	1	0	0	0	0	0	0	0	0	0	0	0
0	2013	0	69	0		0	0	1	0	0	0	0	0	0	0	0	0	0
0	2013	0	30	0		0	0	0	1	0	0	0	0	0	0	0	0	0
0	2013	0	19	0		0	0	0	1	0	0	0	0	0	1	1	0	0
0	2017	0	24	1		0	0	1	1	0	0	0	1	0	1	0	0	0
1	2017	0	23	1		0	0	0	1	0	0	0	0	0	0	0	0	0
0	2017	0	59	1		0	0	0	0	0	1	0	0	0	0	0	0	0
0	2017	1	44	1		0	0	1	0	0	0	0	0	0	0	0	0	0
0	2017	1	10	1		0	0	0	1	0	0	0	0	0	0	0	0	0
0	2017	0	42	1		0	0	1	0	0	0	0	0	0	0	1	0	0
1	2017	0	16	1		0	0	0	1	0	0	0	0	0	0	0	0	0
0	2017	0	22	1		0	0	0	1	0	0	0	0	0	0	0	0	0
1	2017	1	30	1		0	0	0	0	0	0	0	0	0	1	1	0	0
1	2017	1	8	1		0	0	0	1	0	0	0	0	0	0	0	0	0
1	2017	1	36	1		0	0	0	0	0	0	0	1	0	0	0	0	0
0	2017	1	37	1		0	0	0	0	0	0	0	0	1	0	0	0	0
1	2017	0	19	1		0	0	0	1	0	0	0	0	0	0	0	0	0
0	2017	1	38	1		0	0	0	0	0	0	0	1	0	0	0	0	0
0	2017	1	37	1		0	0	0	0	0	0	1	0	0	0	0	0	0
0	2018	1	3	1		0	0	0	1	0	0	0	0	0	0	0	0	0
0	2018	1	58	1		0	0	0	0	0	0	0	0	1	0	0	0	0
0	2018	0	8	1		0	0	0	1	1	0	0	0	0	0	1	0	0
1	2018	0	59	1		0	0	0	1	0	0	0	0	0	0	0	0	0
1	2018	1	16	1		0	0	0	1	0	0	0	0	0	0	0	0	0
1	2018	0	48	1		0	0	0	1	0	0	0	0	0	0	1	0	0
0	2018	0	46	1		0	0	0	1	0	0	0	0	0	0	0	0	0
0	2019	0	49	1		0	0	0	0	0	0	0	0	1	0	0	0	0
0	2019	1	30	1		0	0	1	0	0	0	0	0	0	0	0	0	0
1	2020	0	24	1		0	0	0	1	0	0	0	0	0	0	0	0	0
1	2020	1	58	1		0	0	0	1	0	0	0	0	0	0	0	0	0
1	2020	1	58	1		0	0	0	0	0	0	0	0	0	0	1	0	0
0	2020	0	46	1		0	0	0	0	0	0	1	0	0	0	0	0	0
1	2020	0	49	1		0	0	1	0	1	0	0	0	0	0	0	0	0
0	2020	0	36	1		0	0	0	0	0	0	0	1	0	0	0	0	0
1	2021	0	34	1		0	0	0	0	0	1	0	0	0	0	0	0	0
0	2021	1	49	1		0	0	0	0	0	0	1	0	0	0	0	0	0
0	2021	1	9	1		0	1	0	0	0	0	0	0	0	0	1	0	0
0	2021	0	31	1		0	0	0	0	0	0	0	1	0	0	0	0	0
1	2021	0	5	1		0	0	1	0	0	0	1	0	0	0	0	0	0
0	2021	0	59	1		0	0	0	1	0	0	0	0	0	0	0	0	0
1	2021	0	26	1		0	0	0	1	0	0	0	0	0	0	0	0	0
0	2021	1	34	1		0	0	0	1	0	0	0	0	0	0	0	0	0
0	2021	0	11	1		0	1	1	0	0	0	0	0	0	0	0	0	0
0	2022	0	69	1		0	0	0	0	0	0	0	1	0	0	0	0	0
1	2022	0	50	1		0	0	0	0	0	0	0	1	0	0	0	0	0
0	2022	1	10	1		0	0	0	1	0	0	0	0	1	0	0	0	0
0	2022	0	18	1		0	0	0	0	0	0	1	0	0	0	0	0	0
0	2022	0	65	1		0	0	0	1	0	0	0	0	0	0	0	0	0
1	2022	0	64	1		0	0	0	0	0	0	0	0	1	0	0	0	0
0	2022	1	45	1		0	0	0	0	0	0	0	0	1	0	0	0	0
1	2022	0	63	1		0	0	1	0	0	0	0	0	1	0	0	0	0
0	2022	1	28	1		0	0	0	0	0	0	0	0	1	1	0	0	0
0	2022	0	18	1		0	0	0	1	0	0	0	0	0	0	0	0	0
0	2022	0	57	1		0	0	0	0	0	0	0	1	1	0	0	0	0
0	2022	0	49	1		0	0	1	0	0	0	0	0	0	0	0	0	0
0	2016	0	22	1		0	1	0	0	0	0	1	0	0	0	0	0	0
0	2016	1	25	1		0	0	1	0	0	0	0	0	0	0	0	0	0
0	2016	1	25	1		0	0	0	1	0	0	0	0	0	0	0	0	0
1	2016	1	14	1		0	0	0	0	0	1	0	0	0	0	0	0	0
0	2016	0	67	1		0	0	1	1	0	0	0	0	0	0	0	0	0
1	2016	0	28	1		0	0	0	1	0	0	0	0	0	0	0	0	0
0	2016	0	52	1		0	0	0	0	0	0	0	0	1	0	0	0	0
0	2016	1	20	1		0	0	0	0	0	0	0	0	1	0	0	0	0
0	2016	1	12	1		0	0	0	0	0	0	1	0	0	1	0	0	0
1	2016	1	59	1		0	1	0	1	0	0	0	0	1	0	0	0	0
0	2016	0	16	1		0	1	0	0	0	0	0	0	1	1	0	0	0
0	2016	1	6	1		0	0	0	1	0	0	0	0	0	0	0	0	0
0	2016	0	40	1		0	0	0	0	0	0	0	1	0	0	0	0	0
1	2016	1	47	1		0	0	0	1	0	0	0	0	0	0	0	0	0
0	2016	1	13	1		0	0	0	1	0	0	0	0	0	0	1	0	0
0	2016	0	46	1		0	1	0	1	0	0	0	0	0	0	0	0	0
0	2016	0	15	1		0	0	0	1	0	0	0	0	0	0	0	0	0
0	2016	0	24	1		0	0	0	1	0	0	0	0	1	0	1	0	0
0	2016	1	20	1		0	0	0	0	0	0	1	0	0	0	0	0	0
0	2016	0	49	1		0	0	1	1	0	0	0	0	0	0	0	0	0
0	2016	1	15	1		0	0	0	1	0	0	0	0	0	0	0	0	0
0	2015	0	12	1		0	0	0	1	0	0	0	0	0	0	0	0	0
0	2015	0	12	1		0	0	0	1	1	0	0	0	0	1	0	1	0
0	2015	0	67	1		0	0	0	1	0	0	0	0	0	0	1	0	0
0	2015	0	70	1		0	0	0	0	0	0	0	1	0	0	0	0	0
0	2015	0	10	1		0	0	0	1	0	0	0	0	1	0	0	0	0
0	2015	1	8	1		0	0	1	0	0	0	0	0	1	1	0	0	0
0	2015	0	55	1		0	0	0	0	1	0	0	0	0	0	0	0	0
0	2015	0	23	1		0	0	0	0	0	1	0	0	0	0	0	0	0
0	2015	0	2	1		0	0	1	0	0	0	0	0	1	0	0	0	0
0	2015	0	57	1		0	0	0	1	0	0	0	0	1	0	0	0	0
0	2015	0	42	1		0	0	0	0	0	0	0	0	0	0	0	0	1
0	2015	0	11	1		0	0	0	1	0	0	0	0	1	0	0	0	0
0	2015	0	41	1		0	0	0	1	0	1	0	0	0	0	0	0	0
0	2015	0	5	1		0	1	0	0	0	0	0	0	0	0	0	0	0
0	2015	0	39	1		0	0	1	1	0	0	0	0	0	0	0	0	0
0	2015	1	7	1		0	0	0	0	0	0	1	0	0	0	0	0	0
0	2015	0	28	1		0	0	0	1	0	0	0	0	0	0	0	0	0
0	2015	0	50	1		0	0	0	0	0	0	0	0	0	0	1	0	0
0	2015	0	31	1		0	0	0	0	0	0	0	0	1	0	0	0	0
0	2015	0	28	1		0	0	0	0	0	0	0	0	0	1	0	0	0
0	2015	1	3	1		0	0	1	0	0	0	0	0	0	0	0	0	0
0	2015	0	52	1		0	0	0	1	0	1	0	0	0	0	0	0	0
0	2015	1	18	1		0	0	0	0	0	0	1	0	0	0	0	0	0
0	2015	0	23	1		0	0	0	0	0	1	0	0	0	0	0	0	0
1	2014	0	18	1		0	0	1	0	0	0	0	0	0	0	0	0	0
0	2014	0	66	1		0	0	0	0	0	0	0	1	0	0	0	0	0
0	2014	0	8	1		0	0	1	0	0	0	0	0	0	1	0	0	0
0	2014	1	20	1		0	0	0	0	0	0	1	0	0	0	0	0	0
0	2014	0	14	1		0	0	0	1	0	0	0	0	0	0	0	0	0
0	2014	0	62	1		0	0	1	0	0	1	0	0	0	0	0	0	0
1	2014	0	20	1		0	0	0	1	0	0	0	0	0	0	0	0	0
0	2014	0	18	1		0	0	0	1	0	1	0	0	0	0	0	1	0
0	2014	0	27	1		0	0	0	1	0	0	0	0	0	0	0	0	0
0	2014	1	17	1		0	0	0	1	0	0	0	0	0	0	0	0	0
0	2014	1	9	1		0	0	0	0	0	0	0	0	1	0	0	0	0
0	2014	1	9	1		0	0	0	0	0	0	0	0	0	1	0	0	0
0	2014	0	40	1		0	0	0	1	0	0	0	0	0	0	0	0	0
0	2014	0	6	1		0	0	0	1	0	0	0	0	0	1	0	0	0
0	2014	1	64	1		0	0	0	0	0	0	0	0	0	0	1	0	0
0	2013	1	11	1		0	0	0	1	0	0	0	0	0	0	0	0	0
0	2013	0	25	1		0	0	0	0	0	1	0	0	0	0	0	0	0
0	2013	0	27	1		0	0	0	0	0	0	0	1	0	0	0	0	0
0	2013	1	36	1		0	0	0	0	0	0	0	0	1	0	0	0	0
1	2013	0	12	1		0	0	0	1	0	0	0	0	0	0	0	0	0
1	2013	0	19	1		0	0	0	0	0	0	0	1	0	0	0	0	0
0	2013	0	23	1		0	0	0	0	0	0	0	0	1	0	1	0	0
0	2013	0	52	1		0	0	0	0	1	0	0	0	0	0	0	0	0
0	2013	1	54	1		0	0	1	1	0	0	0	0	0	0	0	0	0
1	2013	0	49	1		0	0	0	1	0	0	0	0	0	0	1	0	0
0	2013	1	13	1		0	0	0	1	0	0	0	0	0	0	0	0	0
